# Supplementary material for: Lipid phenotyping of lung epithelial lining fluid in healthy human volunteers
Source: PubMed Central journal article supplement (PMC6153688; doi:10.1007/s11306-018-1412-2), 2018-09-17
Supplement: 11306_2018_1412_MOESM2_ESM.pdf [file 11306_2018_1412_MOESM2_ESM.pdf]

## SUPPLEMENTARY MATERIAL 2

### Lipid phenotyping of lung epithelial lining fluid in healthy human volunteers

#### Supplementary Table:

A total of 291 ions were measured in 60% or more of the sputum samples; listed here are their assignment and the associated ions that were detected (electrospray ionization mode,  $m/z$  values, mass isotopomers and adducts). The table also shows the abundances (median and range) of each lipid, either normalised to DPPC or as semi-quantitative data, plus the differences between TDA groups A and E and whether these differences were statistically significant (Mann-Whitney U test with a threshold of  $p < 0.05$ ). DPPC itself was normalised to the total amount of lipid in the samples. Where significant, the  $p$ -value is given and the abundance cells colour coded, with red signifying lower median values and green higher ones

Note that the direct infusion shotgun method used in this study does not allow for discrimination between, and quantification of, isomeric or isobaric lipid species. So for example, the single ion at  $m/z$  790.563 could be either a PC (with 36 carbon atoms and no double bonds in the fatty acyl chains) or a PE (with 40 carbon atoms and 7 double bonds in the fatty acyl chains), or indeed comprise a mixture of PCs with different fatty acyl combinations (e.g. PC[18:0/18:0], PC[16:0/20:0], PC[14:0/22:0], etc.). By performing LC-MS/MS on the pooled QC sample the presence of both PC[36:0] and PE[40:7] was confirmed, and the  $m/z$  790.563 ion is therefore listed twice in the table but highlighted with an asterisk (\*). However, for quantitative purposes and in the topological data analysis all isomeric and isobaric lipids were treated as a single variable.

| Lipid                       |     |          |                 |                       | Relative abundance (% of DPPC)   |                   |                                  |                                  | Abundance ( $\mu\text{M}$ normalised to DMPC internal standard) |                   |                        |                        |
|-----------------------------|-----|----------|-----------------|-----------------------|----------------------------------|-------------------|----------------------------------|----------------------------------|-----------------------------------------------------------------|-------------------|------------------------|------------------------|
| Assignment                  | ESI | m/z      | Mass isotopomer | Ion                   | All samples median [range]       | MW U test p-value | Group A median [range]           | Group B median [range]           | All samples median [range]                                      | MW U test p-value | Group A median [range] | Group B median [range] |
| <b>Glycerophospholipids</b> |     |          |                 |                       |                                  |                   |                                  |                                  |                                                                 |                   |                        |                        |
| LPC[16:1]                   | +ve | 494.325  | M+0             | [M+H] <sup>+</sup>    | 0.08 [0-0.25]                    | n.s.              | 0.07 [0-0.25]                    | 0.10 [0-0.20]                    | 0.04 [0-0.60]                                                   | p<0.001           | 0.02 [0-0.13]          | 0.20 [0-0.60]          |
| LPC[16:0]                   | +ve | 496.340  | M+0             | [M+H] <sup>+</sup>    | 0.74 [0.21-5.69]                 | n.s.              | 0.70 [0.21-5.69]                 | 0.80 [0.26-2.28]                 | 0.34 [0.01-5.26]                                                | p<0.001           | 0.28 [0.01-1.22]       | 1.18 [0.20-5.26]       |
|                             | +ve | 497.344  | M+1             | [M+H] <sup>+</sup>    |                                  |                   |                                  |                                  |                                                                 |                   |                        |                        |
| LPC[18:3]                   | +ve | 518.324  | M+0             | [M+H] <sup>+</sup>    | 0.17 [0-0.96]                    | n.s.              | 0.19 [0-0.96]                    | 0.13 [0.03-0.53]                 | 0.07 [0-1.54]                                                   | p<0.001           | 0.05 [0-0.26]          | 0.24 [0.02-1.54]       |
|                             | +ve | 519.329  | M+1             | [M+H] <sup>+</sup>    |                                  |                   |                                  |                                  |                                                                 |                   |                        |                        |
| LPC[18:2]                   | +ve | 520.337  | M+0             | [M+H] <sup>+</sup>    | 0.15 [0-1.08]                    | n.s.              | 0.16 [0-1.08]                    | 0.12 [0.03-0.47]                 | 0.06 [0-1.61]                                                   | p=0.001           | 0.04 [0-0.35]          | 0.12 [0.03-1.61]       |
|                             | +ve | 521.341  | M+1             | [M+H] <sup>+</sup>    |                                  |                   |                                  |                                  |                                                                 |                   |                        |                        |
| LPC[18:1]                   | +ve | 522.354  | M+0             | [M+H] <sup>+</sup>    | 0.23 [0.06-0.96]                 | n.s.              | 0.23 [0.06-0.96]                 | 0.22 [0.06-0.75]                 | 0.09 [0.02-1.25]                                                | p<0.001           | 0.07 [0.02-0.21]       | 0.28 [0.05-1.25]       |
|                             | +ve | 523.352  | M+1             | [M+H] <sup>+</sup>    |                                  |                   |                                  |                                  |                                                                 |                   |                        |                        |
| LPC[18:0]                   | +ve | 524.367  | M+0             | [M+H] <sup>+</sup>    | 0.15 [0-0.92]                    | n.s.              | 0.19 [0-0.92]                    | 0.13 [0-0.47]                    | 0.06 [0-0.92]                                                   | p=0.002           | 0.05 [0-0.21]          | 0.16 [0-0.92]          |
|                             | +ve | 525.383  | M+1             | [M+H] <sup>+</sup>    |                                  |                   |                                  |                                  |                                                                 |                   |                        |                        |
| LPC[24:0]                   | +ve | 608.386  | M+0             | [M+H] <sup>+</sup>    | 0.09 [0-1.49]                    | n.s.              | 0.09 [0-1.49]                    | 0.13 [0-0.54]                    | 0.05 [0-2.12]                                                   | p=0.002           | 0.02 [0-0.44]          | 0.19 [0-2.12]          |
| PCa[30:0]                   | +ve | 692.532* | M+0             | [M+H] <sup>+</sup>    | 0.19 [0-0.38]                    | p=0.030           | 0.21 [0-0.38]                    | 0.15 [0.09-0.29]                 | 0.11 [0-0.83]                                                   | p=0.001           | 0.10 [0-0.14]          | 0.26 [0.07-0.83]       |
|                             | +ve | 693.537* | M+1             | [M+H] <sup>+</sup>    |                                  |                   |                                  |                                  |                                                                 |                   |                        |                        |
| PC[30:1]                    | +ve | 704.564* | M+0             | [M+H] <sup>+</sup>    | 0.41 [0.18-2.45]                 | p=0.044           | 0.49 [0.18-2.45]                 | 0.35 [0.20-0.82]                 | 0.18 [0.04-1.83]                                                | p<0.001           | 0.15 [0.04-0.41]       | 0.50 [0.14-1.83]       |
|                             | +ve | 705.578* | M+1             | [M+H] <sup>+</sup>    |                                  |                   |                                  |                                  |                                                                 |                   |                        |                        |
| PC[30:0]                    | +ve | 706.539  | M+0             | [M+H] <sup>+</sup>    | 11.39 [5.00-20.07]               | p=0.040           | 10.53 [5.00-20.07]               | 12.88 [7.20-18.68]               | 5.73 [0.21-65.88]                                               | p<0.001           | 3.66 [0.21-11.20]      | 21.24 [5.12-65.88]     |
|                             | +ve | 707.542  | M+1             | [M+H] <sup>+</sup>    |                                  |                   |                                  |                                  |                                                                 |                   |                        |                        |
|                             | +ve | 708.543  | M+2             | [M+H] <sup>+</sup>    |                                  |                   |                                  |                                  |                                                                 |                   |                        |                        |
|                             | +ve | 709.543  | M+3             | [M+H] <sup>+</sup>    |                                  |                   |                                  |                                  |                                                                 |                   |                        |                        |
|                             | -ve | 750.532  | M+0             | [M+HCOO] <sup>-</sup> |                                  |                   |                                  |                                  |                                                                 |                   |                        |                        |
|                             | -ve | 751.535  | M+1             | [M+HCOO] <sup>-</sup> |                                  |                   |                                  |                                  |                                                                 |                   |                        |                        |
| PCa[32:2]                   | +ve | 716.543* | M+0             | [M+H] <sup>+</sup>    | 0.13 [0.06-0.54]                 | p=0.007           | 0.14 [0.07-0.54]                 | 0.09 [0.06-0.19]                 | 0.06 [0.01-0.69]                                                | p<0.001           | 0.04 [0.01-0.10]       | 0.17 [0.05-0.69]       |
|                             | +ve | 717.553* | M+1             | [M+H] <sup>+</sup>    |                                  |                   |                                  |                                  |                                                                 |                   |                        |                        |
| PCa[32:1]                   | +ve | 718.558* | M+0             | [M+H] <sup>+</sup>    | 0.54 [0.35-1.40]                 | n.s.              | 0.55 [0.35-1.40]                 | 0.51 [0.36-0.93]                 | 0.28 [0.02-2.09]                                                | p<0.001           | 0.18 [0.02-0.46]       | 0.91 [0.25-2.09]       |
|                             | +ve | 719.563* | M+1             | [M+H] <sup>+</sup>    |                                  |                   |                                  |                                  |                                                                 |                   |                        |                        |
| PCa[32:0]                   | +ve | 720.560* | M+0             | [M+H] <sup>+</sup>    | 2.53 [1.45-5.14]                 | n.s.              | 2.42 [1.45-5.14]                 | 2.61 [1.49-3.98]                 | 1.26 [0.07-13.52]                                               | p<0.001           | 0.76 [0.07-2.59]       | 4.89 [1.05-13.52]      |
|                             | +ve | 721.565* | M+1             | [M+H] <sup>+</sup>    |                                  |                   |                                  |                                  |                                                                 |                   |                        |                        |
|                             | +ve | 722.559  | M+2             | [M+H] <sup>+</sup>    |                                  |                   |                                  |                                  |                                                                 |                   |                        |                        |
| PC[32:2]                    | +ve | 730.550* | M+0             | [M+H] <sup>+</sup>    | 0.41 [0-0.63]                    | n.s.              | 0.36 [0-0.55]                    | 0.44 [0.28-0.63]                 | 0.22 [0-2.38]                                                   | p<0.001           | 0.17 [0-0.49]          | 0.73 [0.19-2.38]       |
|                             | +ve | 731.603* | M+1             | [M+H] <sup>+</sup>    |                                  |                   |                                  |                                  |                                                                 |                   |                        |                        |
| PC[32:1]                    | +ve | 732.554* | M+0             | [M+H] <sup>+</sup>    | 10.93 [5.28-18.68]               | p=0.001           | 9.76 [5.28-18.68]                | 14.36 [7.49-18.68]               | 5.55 [0.21-69.42]                                               | p<0.001           | 3.35 [0.21-14.62]      | 20.01 [3.47-69.42]     |
|                             | +ve | 733.558* | M+1             | [M+H] <sup>+</sup>    |                                  |                   |                                  |                                  |                                                                 |                   |                        |                        |
| PC[32:0]                    | +ve | 734.569  | M+0             | [M+H] <sup>+</sup>    | 33.13 [22.53-40.71] <sup>†</sup> | p=0.26            | 34.61 [22.53-40.71] <sup>†</sup> | 31.51 [29.00-36.19] <sup>†</sup> | 53.00 [2.44-387.48]                                             | p<0.001           | 35.77 [2.44-98.28]     | 147.02 [42.73-387.48]  |
|                             | +ve | 735.573  | M+1             | [M+H] <sup>+</sup>    |                                  |                   |                                  |                                  |                                                                 |                   |                        |                        |
|                             | +ve | 736.575  | M+2             | [M+H] <sup>+</sup>    |                                  |                   |                                  |                                  |                                                                 |                   |                        |                        |
|                             | +ve | 737.577  | M+3             | [M+H] <sup>+</sup>    |                                  |                   |                                  |                                  |                                                                 |                   |                        |                        |
|                             | +ve | 738.573* | M+4             | [M+H] <sup>+</sup>    |                                  |                   |                                  |                                  |                                                                 |                   |                        |                        |
|                             | -ve | 778.561  | M+0             | [M+HCOO] <sup>-</sup> |                                  |                   |                                  |                                  |                                                                 |                   |                        |                        |
|                             | -ve | 779.564  | M+1             | [M+HCOO] <sup>-</sup> |                                  |                   |                                  |                                  |                                                                 |                   |                        |                        |
|                             | -ve | 780.567  | M+2             | [M+HCOO] <sup>-</sup> |                                  |                   |                                  |                                  |                                                                 |                   |                        |                        |
| PCa[34:2]                   | +ve | 744.564* | M+0             | [M+H] <sup>+</sup>    | 0.38 [0-0.65]                    | n.s.              | 0.34 [0-0.65]                    | 0.42 [0.24-0.50]                 | 0.20 [0-1.80]                                                   | p<0.001           | 0.13 [0-0.33]          | 0.70 [0.15-1.80]       |
|                             | +ve | 745.568* | M+1             | [M+H] <sup>+</sup>    |                                  |                   |                                  |                                  |                                                                 |                   |                        |                        |
| PCa[34:1]                   | +ve | 746.579* | M+0             | [M+H] <sup>+</sup>    | 1.32 [0.73-2.02]                 | n.s.              | 1.33 [0.83-2.02]                 | 1.28 [0.73-1.87]                 | 0.62 [0.04-5.93]                                                | p<0.001           | 0.39 [0.04-1.03]       | 2.29 [0.42-5.93]       |
|                             | +ve | 747.582* | M+1             | [M+H] <sup>+</sup>    |                                  |                   |                                  |                                  |                                                                 |                   |                        |                        |
| PCa[34:0]                   | +ve | 748.584* | M+0             | [M+H] <sup>+</sup>    | 2.26 [1.21-3.41]                 | n.s.              | 2.13 [1.21-3.41]                 | 2.40 [1.30-3.32]                 | 1.08 [0.06-12.03]                                               | p<0.001           | 0.63 [0.06-2.31]       | 4.28 [0.75-12.03]      |
|                             | +ve | 749.576  | M+1             | [M+H] <sup>+</sup>    |                                  |                   |                                  |                                  |                                                                 |                   |                        |                        |
|                             | +ve | 750.562  | M+2             | [M+H] <sup>+</sup>    |                                  |                   |                                  |                                  |                                                                 |                   |                        |                        |
|                             | +ve | 751.563  | M+3             | [M+H] <sup>+</sup>    |                                  |                   |                                  |                                  |                                                                 |                   |                        |                        |

Continued

| Lipid       |                          |                                          |                          |                                                                                            | Relative abundance (% of DPPC) |                   |                        |                        | Abundance (µM normalised to DMPC internal standard) |                   |                        |                        |
|-------------|--------------------------|------------------------------------------|--------------------------|--------------------------------------------------------------------------------------------|--------------------------------|-------------------|------------------------|------------------------|-----------------------------------------------------|-------------------|------------------------|------------------------|
| Assignment  | ESI                      | m/z                                      | Mass isotopomer          | Ion                                                                                        | All samples median [range]     | MW U test p-value | Group A median [range] | Group B median [range] | All samples median [range]                          | MW U test p-value | Group A median [range] | Group B median [range] |
| PC[34:4]    | +ve<br>+ve               | 754.540<br>755.544                       | M+0<br>M+1               | [M+H] <sup>+</sup><br>[M+H] <sup>+</sup>                                                   | 0.84 [0.52-1.68]               | p=0.002           | 0.74 [0.52-1.68]       | 0.99 [0.71-1.41]       | 0.40 [0.04-4.15]                                    | p<0.001           | 0.26 [0.04-0.78]       | 1.59 [0.40-4.15]       |
| PC[34:3]    | +ve<br>+ve               | 756.553<br>757.555                       | M+0<br>M+1               | [M+H] <sup>+</sup><br>[M+H] <sup>+</sup>                                                   | 6.55 [4.37-11.47]              | p<0.001           | 5.82 [4.37-10.94]      | 8.04 [5.41-11.47]      | 3.71 [0.27-37.24]                                   | p<0.001           | 2.12 [0.27-6.03]       | 13.47 [3.82-37.24]     |
| PC[34:2]    | +ve<br>+ve<br>-ve<br>-ve | 758.568<br>759.572<br>802.560<br>804.576 | M+0<br>M+1<br>M+0<br>M+1 | [M+H] <sup>+</sup><br>[M+H] <sup>+</sup><br>[M+HCOO] <sup>-</sup><br>[M+HCOO] <sup>-</sup> | 6.89 [3.67-10.93]              | p<0.001           | 5.44 [3.67-8.76]       | 8.18 [5.70-10.93]      | 3.81 [0.14-39.46]                                   | p<0.001           | 1.83 [0.14-6.92]       | 10.73 [4.49-39.46]     |
| PC[34:1]    | +ve<br>+ve<br>-ve<br>-ve | 760.585<br>761.588<br>805.579<br>806.588 | M+0<br>M+1<br>M+0<br>M+1 | [M+H] <sup>+</sup><br>[M+H] <sup>+</sup><br>[M+HCOO] <sup>-</sup><br>[M+HCOO] <sup>-</sup> | 18.10 [10.08-28.09]            | p<0.001           | 15.90 [10.08-22.85]    | 21.37 [12.21-28.09]    | 8.72 [0.36-108.85]                                  | p<0.001           | 5.23 [0.36-17.23]      | 31.89 [6.80-108.85]    |
| PC[34:0]    | +ve<br>+ve<br>+ve        | 762.596<br>763.603<br>764.606*           | M+0<br>M+1<br>M+2        | [M+H] <sup>+</sup><br>[M+H] <sup>+</sup><br>[M+H] <sup>+</sup>                             | 4.61 [3.04-7.62]               | p=0.001           | 4.12 [3.04-6.16]       | 5.23 [3.19-7.62]       | 2.20 [0.11-29.54]                                   | p<0.001           | 1.26 [0.11-4.53]       | 7.51 [1.78-29.54]      |
| PCa[36:2]   | +ve                      | 772.592                                  | M+0                      | [M+H] <sup>+</sup>                                                                         | 0.23 [0-0.34]                  | p=0.041           | 0.22 [0-0.32]          | 0.27 [0-0.34]          | 0.15 [0-1.16]                                       | p<0.001           | 0.09 [0-0.18]          | 0.53 [0-1.16]          |
| PCa[36:1]   | +ve<br>+ve               | 774.605<br>775.556                       | M+0<br>M+1               | [M+H] <sup>+</sup><br>[M+H] <sup>+</sup>                                                   | 0.34 [0-0.63]                  | n.s.              | 0.32 [0.20-0.63]       | 0.35 [0-0.48]          | 0.18 [0-1.51]                                       | p<0.001           | 0.09 [0.02-0.26]       | 0.62 [0-1.51]          |
| PCa[36:0]   | +ve<br>+ve<br>+ve        | 776.562<br>777.564<br>778.581            | M+0<br>M+1<br>M+2        | [M+H] <sup>+</sup><br>[M+H] <sup>+</sup><br>[M+H] <sup>+</sup>                             | 0.27 [0-0.77]                  | n.s.              | 0.38 [0-0.77]          | 0.26 [0.15-0.50]       | 0.17 [0-1.39]                                       | p<0.001           | 0.10 [0-0.30]          | 0.44 [0.15-1.39]       |
| PC[36:5]    | +ve<br>+ve               | 780.558<br>781.561                       | M+0<br>M+1               | [M+H] <sup>+</sup><br>[M+H] <sup>+</sup>                                                   | 0.55 [0-1.16]                  | p<0.001           | 0.49 [0-1.06]          | 0.70 [0.50-1.16]       | 0.35 [0-3.28]                                       | p<0.001           | 0.17 [0-0.51]          | 1.12 [0.37-3.28]       |
| PC[36:4]    | +ve                      | 782.569                                  | M+0                      | [M+H] <sup>+</sup>                                                                         | 2.18 [1.25-3.95]               | p<0.001           | 1.71 [1.25-3.21]       | 2.60 [2.16-3.95]       | 1.20 [0.06-13.94]                                   | p<0.001           | 0.48 [0.06-2.23]       | 3.90 [1.28-13.94]      |
| PC[36:3]    | +ve<br>+ve               | 784.583<br>785.588                       | M+0<br>M+1               | [M+H] <sup>+</sup><br>[M+H] <sup>+</sup>                                                   | 1.49 [0-3.21]                  | p<0.001           | 1.20 [0-3.21]          | 1.95 [0.86-2.97]       | 1.04 [0-11.49]                                      | p<0.001           | 0.68 [0-2.16]          | 2.41 [0.48-11.49]      |
| PC[36:2]    | +ve<br>+ve<br>-ve        | 786.599<br>787.606<br>830.590            | M+0<br>M+1<br>M+0        | [M+H] <sup>+</sup><br>[M+H] <sup>+</sup><br>[M+HCOO] <sup>-</sup>                          | 2.53 [1.28-5.00]               | p=0.001           | 2.31 [1.28-4.70]       | 3.13 [2.17-5.00]       | 1.36 [0.07-19.37]                                   | p<0.001           | 0.86 [0.07-2.61]       | 4.13 [1.21-19.37]      |
| PC[36:1]    | +ve<br>+ve               | 788.613<br>789.619                       | M+0<br>M+1               | [M+H] <sup>+</sup><br>[M+H] <sup>+</sup>                                                   | 1.52 [0.87-2.99]               | n.s.              | 1.34 [0.87-2.75]       | 1.72 [0.87-2.99]       | 0.76 [0.05-11.59]                                   | p<0.001           | 0.43 [0.05-1.26]       | 2.47 [0.48-11.59]      |
| PC[36:0]    | +ve<br>+ve               | 790.563*<br>791.564*                     | M+0<br>M+1               | [M+H] <sup>+</sup><br>[M+H] <sup>+</sup>                                                   | 0.59 [0.12-3.60]               | n.s.              | 0.72 [0.12-3.60]       | 0.45 [0.27-1.14]       | 0.32 [0.03-3.13]                                    | p<0.001           | 0.23 [0.03-0.72]       | 0.78 [0.23-3.13]       |
| Putative PC | +ve                      | 794.592*                                 | NA                       | NA                                                                                         | 0.35 [0.03-0.61]               | n.s.              | 0.31 [0.03-0.54]       | 0.40 [0.23-0.61]       | 0.18 [0.01-2.00]                                    | p<0.001           | 0.10 [0.01-0.23]       | 0.60 [0.24-2.00]       |
| Putative PC | +ve                      | 796.601*                                 | NA                       | NA                                                                                         | 0.17 [0-0.73]                  | n.s.              | 0.19 [0-0.73]          | 0.16 [0.10-0.24]       | 0.09 [0-0.80]                                       | p<0.001           | 0.06 [0-0.16]          | 0.27 [0.08-0.80]       |
| PC[38:6]    | +ve<br>+ve               | 806.568<br>807.572                       | M+0<br>M+1               | [M+H] <sup>+</sup><br>[M+H] <sup>+</sup>                                                   | 0.33 [0-0.67]                  | p=0.002           | 0.27 [0-0.65]          | 0.38 [0.22-0.67]       | 0.20 [0-2.53]                                       | p<0.001           | 0.11 [0-0.34]          | 0.63 [0.12-2.53]       |
| PC[38:5]    | +ve<br>+ve               | 808.582<br>809.588                       | M+0<br>M+1               | [M+H] <sup>+</sup><br>[M+H] <sup>+</sup>                                                   | 0.48 [0.29-1.09]               | p=0.007           | 0.45 [0.29-1.09]       | 0.56 [0.43-0.84]       | 0.25 [0.03-3.01]                                    | p<0.001           | 0.13 [0.03-0.49]       | 0.84 [0.25-3.01]       |
| PC[38:4]    | +ve<br>+ve               | 810.597*<br>811.610*                     | M+0<br>M+1               | [M+H] <sup>+</sup><br>[M+H] <sup>+</sup>                                                   | 0.48 [0.28-1.66]               | n.s.              | 0.47 [0.28-1.66]       | 0.49 [0.36-0.83]       | 0.24 [0.03-2.93]                                    | p<0.001           | 0.13 [0.03-0.48]       | 0.74 [0.22-2.93]       |
| PC[38:2]    | +ve<br>+ve               | 814.539<br>815.539                       | M+0<br>M+1               | [M+H] <sup>+</sup><br>[M+H] <sup>+</sup>                                                   | 0.13 [0-0.56]                  | n.s.              | 0.21 [0-0.56]          | 0.12 [0.06-0.50]       | 0.07 [0-1.17]                                       | p<0.001           | 0.05 [0-0.20]          | 0.23 [0.05-1.17]       |
| PC[38:1]    | +ve<br>+ve               | 816.571<br>817.582                       | M+0<br>M+1               | [M+H] <sup>+</sup><br>[M+H] <sup>+</sup>                                                   | 0.10 [0-0.42]                  | p=0.003           | 0.14 [0-0.42]          | 0.08 [0-0.18]          | 0.06 [0-0.41]                                       | p<0.001           | 0.04 [0-0.08]          | 0.11 [0-0.41]          |
| PC[38:0]    | +ve                      | 818.593                                  | M+0                      | [M+H] <sup>+</sup>                                                                         | 0.06 [0-0.16]                  | n.s.              | 0.08 [0-0.16]          | 0.06 [0-0.10]          | 0.04 [0-0.49]                                       | p<0.001           | 0.03 [0-0.06]          | 0.09 [0-0.49]          |
| Putative PC | +ve<br>+ve               | 826.669*<br>827.692*                     | NA<br>NA                 | NA<br>NA                                                                                   | 0.05 [0-0.12]                  | n.s.              | 0.06 [0-0.12]          | 0.05 [0-0.06]          | 0.03 [0-0.39]                                       | p=0.027           | 0.02 [0-0.07]          | 0.09 [0-0.39]          |
| PCa[40:2]   | +ve<br>+ve               | 828.692*<br>829.690*                     | M+0<br>M+1               | [M+H] <sup>+</sup><br>[M+H] <sup>+</sup>                                                   | 0.08 [0-0.38]                  | p<0.001           | 0.14 [0-0.38]          | 0.05 [0-0.16]          | 0.04 [0-0.56]                                       | n.s.              | 0.03 [0-0.12]          | 0.04 [0-0.56]          |

Continued

| Lipid       |     |          |                 |                    | Relative abundance (% of DPPC) |                   |                        |                        | Abundance ( $\mu\text{M}$ normalised to DMPC internal standard) |                   |                        |                        |
|-------------|-----|----------|-----------------|--------------------|--------------------------------|-------------------|------------------------|------------------------|-----------------------------------------------------------------|-------------------|------------------------|------------------------|
| Assignment  | ESI | m/z      | Mass isotopomer | Ion                | All samples median [range]     | MW U test p-value | Group A median [range] | Group B median [range] | All samples median [range]                                      | MW U test p-value | Group A median [range] | Group B median [range] |
| PCa[40:1]   | +ve | 830.699* | M+0             | [M+H] <sup>+</sup> | 0.05 [0-0.18]                  | p=0.036           | 0.06 [0-0.18]          | 0.04 [0-0.07]          | 0.02 [0-0.38]                                                   | p=0.048           | 0.02 [0-0.05]          | 0.09 [0-0.38]          |
|             | +ve | 831.698* | M+1             | [M+H] <sup>+</sup> |                                |                   |                        |                        |                                                                 |                   |                        |                        |
| PC[40:6]    | +ve | 834.604  | M+0             | [M+H] <sup>+</sup> | 0.14 [0-0.24]                  | n.s.              | 0.17 [0-0.24]          | 0.11 [0-0.19]          | 0.08 [0-0.71]                                                   | p<0.001           | 0.07 [0-0.10]          | 0.23 [0-0.71]          |
|             | +ve | 856.724* | M+0             | [M+H] <sup>+</sup> |                                |                   |                        |                        |                                                                 |                   |                        |                        |
| PCa[42:2]   | +ve | 856.724* | M+0             | [M+H] <sup>+</sup> | 0.05 [0-0.14]                  | p=0.018           | 0.07 [0-0.14]          | 0.03 [0-0.13]          | 0.03 [0-0.25]                                                   | n.s.              | 0.02 [0-0.09]          | 0.04 [0-0.25]          |
|             | +ve | 857.709  | M+1             | [M+H] <sup>+</sup> |                                |                   |                        |                        |                                                                 |                   |                        |                        |
| PC[44:11]   | +ve | 880.596* | M+0             | [M+H] <sup>+</sup> | 0.13 [0-0.27]                  | n.s.              | 0.13 [0-0.27]          | 0.10 [0.06-0.20]       | 0.06 [0-0.60]                                                   | p<0.001           | 0.04 [0-0.09]          | 0.16 [0.05-0.60]       |
|             | +ve | 881.599  | M+1             | [M+H] <sup>+</sup> |                                |                   |                        |                        |                                                                 |                   |                        |                        |
| PE[32:1]    | +ve | 690.598  | M+0             | [M+H] <sup>+</sup> | 0.12 [0-0.47]                  | p=0.024           | 0.16 [0-0.47]          | 0.04 [0-0.12]          | 0.04 [0-0.11]                                                   | p=0.036           | 0.05 [0-0.11]          | 0.02 [0-0.02]          |
| PE[32:0]    | +ve | 692.532* | M+0             | [M+H] <sup>+</sup> | 0.19 [0-0.38]                  | p=0.036           | 0.21 [0-0.38]          | 0.15 [0.09-0.29]       | 0.11 [0-0.83]                                                   | p=0.001           | 0.10 [0-0.14]          | 0.26 [0.07-0.83]       |
|             | +ve | 693.537* | M+1             | [M+H] <sup>+</sup> |                                |                   |                        |                        |                                                                 |                   |                        |                        |
| PEa[34:2]   | +ve | 702.533  | M+0             | [M+H] <sup>+</sup> | 0.14 [0-1.54]                  | p=0.022           | 0.24 [0-1.54]          | 0.12 [0-0.31]          | 0.06 [0-1.40]                                                   | p=0.045           | 0.05 [0-0.21]          | 0.17 [0-1.40]          |
| PEa[34:1]   | +ve | 704.564* | M+1             | [M+H] <sup>+</sup> | 0.41 [0.18-2.45]               | p=0.046           | 0.49 [0.18-2.45]       | 0.35 [0.20-0.82]       | 0.18 [0.04-1.83]                                                | p<0.001           | 0.15 [0.04-0.41]       | 0.50 [0.14-1.83]       |
| PE[34:2]    | +ve | 716.543* | M+0             | [M+H] <sup>+</sup> | 0.13 [0.06-0.54]               | p=0.010           | 0.14 [0.07-0.54]       | 0.09 [0.06-0.19]       | 0.06 [0.01-0.69]                                                | p<0.001           | 0.04 [0.01-0.10]       | 0.17 [0.05-0.69]       |
|             | +ve | 717.553* | M+1             | [M+H] <sup>+</sup> |                                |                   |                        |                        |                                                                 |                   |                        |                        |
| PE[34:1]    | +ve | 718.558* | M+0             | [M+H] <sup>+</sup> | 0.54 [0.35-1.40]               | n.s.              | 0.55 [0.35-1.40]       | 0.51 [0.36-0.93]       | 0.28 [0.02-2.09]                                                | p<0.001           | 0.18 [0.02-0.46]       | 0.91 [0.25-2.09]       |
|             | +ve | 719.563* | M+1             | [M+H] <sup>+</sup> |                                |                   |                        |                        |                                                                 |                   |                        |                        |
| PE[34:0]    | +ve | 720.560* | M+0             | [M+H] <sup>+</sup> | 2.53 [1.45-5.14]               | n.s.              | 2.42 [1.45-5.14]       | 2.61 [1.49-3.98]       | 1.26 [0.07-13.52]                                               | p<0.001           | 0.76 [0.07-2.59]       | 4.89 [1.05-13.52]      |
|             | +ve | 721.565* | M+1             | [M+H] <sup>+</sup> |                                |                   |                        |                        |                                                                 |                   |                        |                        |
| PEa[36:2]   | +ve | 730.550* | M+0             | [M+H] <sup>+</sup> | 0.41 [0-0.63]                  | n.s.              | 0.36 [0-0.55]          | 0.44 [0.28-0.63]       | 0.22 [0-2.38]                                                   | p<0.001           | 0.17 [0-0.49]          | 0.73 [0.19-2.38]       |
|             | +ve | 731.603* | M+1             | [M+H] <sup>+</sup> |                                |                   |                        |                        |                                                                 |                   |                        |                        |
| PEa[36:1]   | +ve | 732.554* | M+0             | [M+H] <sup>+</sup> | 10.93 [5.28-18.68]             | p=0.002           | 9.76 [5.28-18.83]      | 14.36 [7.49-18.68]     | 5.55 [0.21-69.42]                                               | p<0.001           | 3.35 [0.21-14.62]      | 20.01 [3.47-69.42]     |
|             | +ve | 733.558* | M+1             | [M+H] <sup>+</sup> |                                |                   |                        |                        |                                                                 |                   |                        |                        |
| PE[36:5]    | +ve | 738.573* | M+0             | [M+H] <sup>+</sup> | 0.21 [0-0.34]                  | n.s.              | 0.21 [0-0.34]          | 0.21 [0-0.29]          | 0.12 [0-1.06]                                                   | p<0.001           | 0.08 [0-0.20]          | 0.40 [0.09-1.06]       |
|             | +ve | 739.556  | M+1             | [M+H] <sup>+</sup> |                                |                   |                        |                        |                                                                 |                   |                        |                        |
| PE[36:4]    | +ve | 740.539  | M+0             | [M+H] <sup>+</sup> | 0.13 [0-0.38]                  | n.s.              | 0.12 [0-0.26]          | 0.14 [0-0.38]          | 0.08 [0-0.71]                                                   | p<0.001           | 0.06 [0-0.19]          | 0.16 [0-0.71]          |
|             | +ve | 741.542  | M+1             | [M+H] <sup>+</sup> |                                |                   |                        |                        |                                                                 |                   |                        |                        |
| PE[36:3]    | +ve | 742.545  | M+0             | [M+H] <sup>+</sup> | 0.37 [0.21-0.61]               | p=0.002           | 0.28 [0.21-0.61]       | 0.46 [0.26-0.58]       | 0.20 [0.01-1.89]                                                | p<0.001           | 0.09 [0.01-0.26]       | 0.77 [0.21-1.89]       |
| PE[36:2]    | +ve | 744.564* | M+0             | [M+H] <sup>+</sup> | 0.38 [0-0.65]                  | n.s.              | 0.34 [0-0.65]          | 0.42 [0.24-0.50]       | 0.20 [0-1.80]                                                   | p<0.001           | 0.13 [0-0.33]          | 0.70 [0.15-1.80]       |
|             | +ve | 745.568* | M+1             | [M+H] <sup>+</sup> |                                |                   |                        |                        |                                                                 |                   |                        |                        |
| PE[36:1]    | +ve | 746.579* | M+0             | [M+H] <sup>+</sup> | 1.32 [0.73-2.02]               | n.s.              | 1.33 [0.83-2.02]       | 1.28 [0.73-1.87]       | 0.62 [0.04-5.93]                                                | p<0.001           | 0.39 [0.04-1.03]       | 2.29 [0.42-5.93]       |
|             | +ve | 747.582* | M+1             | [M+H] <sup>+</sup> |                                |                   |                        |                        |                                                                 |                   |                        |                        |
|             | +ve | 748.584* | M+2             | [M+H] <sup>+</sup> |                                |                   |                        |                        |                                                                 |                   |                        |                        |
| PE[38:6]    | +ve | 764.606* | M+0             | [M+H] <sup>+</sup> | 0.78 [0-23.55]                 | n.s.              | 0.85 [0-23.55]         | 0.46 [0.18-3.10]       | 0.45 [0-2.57]                                                   | p<0.001           | 0.16 [0-1.39]          | 1.04 [0.17-2.57]       |
|             | +ve | 765.608  | M+1             | [M+H] <sup>+</sup> |                                |                   |                        |                        |                                                                 |                   |                        |                        |
| PE[38:5]    | +ve | 766.559  | M+0             | [M+H] <sup>+</sup> | 0.44 [0-0.76]                  | n.s.              | 0.36 [0-0.76]          | 0.49 [0.19-0.75]       | 0.29 [0-2.22]                                                   | p<0.001           | 0.15 [0-0.37]          | 0.84 [0.29-2.22]       |
|             | +ve | 767.561  | M+1             | [M+H] <sup>+</sup> |                                |                   |                        |                        |                                                                 |                   |                        |                        |
| PE[38:4]    | +ve | 768.565  | M+0             | [M+H] <sup>+</sup> | 0.37 [0-1.05]                  | n.s.              | 0.40 [0-1.05]          | 0.37 [0.27-0.54]       | 0.22 [0-1.64]                                                   | p<0.001           | 0.13 [0-0.29]          | 0.65 [0.18-1.64]       |
|             | +ve | 769.566  | M+1             | [M+H] <sup>+</sup> |                                |                   |                        |                        |                                                                 |                   |                        |                        |
| PE[40:7]    | +ve | 790.563* | M+0             | [M+H] <sup>+</sup> | 0.59 [0.12-3.60]               | n.s.              | 0.72 [0.12-3.60]       | 0.45 [0.27-1.14]       | 0.32 [0.03-3.13]                                                | p<0.001           | 0.23 [0.03-0.72]       | 0.78 [0.23-3.13]       |
|             | +ve | 791.564* | M+1             | [M+H] <sup>+</sup> |                                |                   |                        |                        |                                                                 |                   |                        |                        |
| PE[40:6]    | +ve | 792.573  | M+0             | [M+H] <sup>+</sup> | 0.37 [0.05-1.28]               | n.s.              | 0.32 [0.05-1.28]       | 0.38 [0.20-0.70]       | 0.24 [0.01-1.73]                                                | p<0.001           | 0.12 [0.01-0.30]       | 0.59 [0.24-1.73]       |
|             | +ve | 793.578  | M+1             | [M+H] <sup>+</sup> |                                |                   |                        |                        |                                                                 |                   |                        |                        |
| PE[40:5]    | +ve | 794.592* | M+0             | [M+H] <sup>+</sup> | 0.35 [0.03-0.61]               | n.s.              | 0.31 [0.03-0.54]       | 0.40 [0.23-0.61]       | 0.18 [0.01-2.00]                                                | p<0.001           | 0.10 [0.01-0.23]       | 0.60 [0.24-2.00]       |
|             | +ve | 795.595  | M+1             | [M+H] <sup>+</sup> |                                |                   |                        |                        |                                                                 |                   |                        |                        |
| PE[40:4]    | +ve | 796.601* | M+0             | [M+H] <sup>+</sup> | 0.17 [0-0.73]                  | n.s.              | 0.19 [0-0.73]          | 0.16 [0.10-0.24]       | 0.09 [0-0.80]                                                   | p<0.001           | 0.06 [0-0.16]          | 0.27 [0.08-0.80]       |
|             | +ve | 797.528  | M+1             | [M+H] <sup>+</sup> |                                |                   |                        |                        |                                                                 |                   |                        |                        |
| Putative PE | +ve | 810.597* | M+0             | NA                 | 0.48 [0.28-1.66]               | n.s.              | 0.47 [0.28-1.66]       | 0.49 [0.36-0.83]       | 0.24 [0.03-2.93]                                                | p<0.001           | 0.13 [0.03-0.48]       | 0.74 [0.22-2.93]       |
|             | +ve | 811.610* | M+1             | NA                 |                                |                   |                        |                        |                                                                 |                   |                        |                        |
| PS[36:1]    | -ve | 788.546  | M+0             | [M-H] <sup>-</sup> | 4.44 [0-28.87]                 | n.s.              | 5.95 [0-28.87]         | 3.73 [0-11.44]         | 2.61 [0-14.28]                                                  | p=0.002           | 1.80 [0-4.40]          | 3.65 [0-14.28]         |
|             | -ve | 789.548  | M+1             | [M-H] <sup>-</sup> |                                |                   |                        |                        |                                                                 |                   |                        |                        |

Continued

| Lipid                |     |          |                 |          | Relative abundance (% of DPPC) |                   |                        |                        | Abundance (µM normalised to DMPC internal standard) |                   |                        |                        |
|----------------------|-----|----------|-----------------|----------|--------------------------------|-------------------|------------------------|------------------------|-----------------------------------------------------|-------------------|------------------------|------------------------|
| Assignment           | ESI | m/z      | Mass isotopomer | Ion      | All samples median [range]     | MW U test p-value | Group A median [range] | Group B median [range] | All samples median [range]                          | MW U test p-value | Group A median [range] | Group B median [range] |
| PG[34:1]             | -ve | 747.529  | M+0             | [M-H]-   | 11.07 [0-20.60]                | n.s.              | 9.45 [0-19.29]         | 11.44 [0-20.60]        | 4.90 [0-33.11]                                      | p<0.001           | 3.51 [0-6.05]          | 10.19 [0-33.11]        |
|                      | -ve | 748.529  | M+1             | [M-H]-   |                                |                   |                        |                        |                                                     |                   |                        |                        |
| PG[36:2]             | -ve | 773.534  | M+0             | [M-H]-   | 6.03 [0-13.65]                 | p=0.002           | 5.18 [0-8.80]          | 6.91 [0-13.65]         | 2.92 [0-16.91]                                      | p<0.001           | 1.88 [0-4.36]          | 5.47 [0-16.91]         |
|                      | -ve | 774.538  | M+1             | [M-H]-   |                                |                   |                        |                        |                                                     |                   |                        |                        |
| PG[36:1]             | -ve | 775.549  | M+0             | [M-H]-   | 8.03 [0-14.90]                 | n.s.              | 7.25 [0-13.02]         | 8.64 [0-14.90]         | 3.63 [0-20.66]                                      | p<0.001           | 2.32 [0-4.17]          | 6.29 [0-20.66]         |
|                      | -ve | 776.547  | M+1             | [M-H]-   |                                |                   |                        |                        |                                                     |                   |                        |                        |
| PI[36:2]             | -ve | 861.551  | M+0             | [M-H]-   | 2.36 [0-5.76]                  | n.s.              | 2.18 [0-4.14]          | 2.59 [0-5.76]          | 1.62 [0-11.97]                                      | p<0.001           | 1.10 [0-1.79]          | 3.38 [0-11.97]         |
|                      | +ve | 863.569  | M+0             | [M+H]+   |                                |                   |                        |                        |                                                     |                   |                        |                        |
|                      | +ve | 880.596* | M+0             | [M+NH4]+ |                                |                   |                        |                        |                                                     |                   |                        |                        |
|                      | +ve | 885.558  | M+0             | [M+Na]+  |                                |                   |                        |                        |                                                     |                   |                        |                        |
| PI[36:1]             | -ve | 863.564  | M+0             | [M-H]-   | 2.97 [0-8.56]                  | n.s.              | 2.47 [0-8.56]          | 3.90 [0-7.72]          | 1.92 [0-15.15]                                      | p<0.001           | 1.11 [0-1.92]          | 3.52 [0-15.15]         |
|                      | +ve | 865.581  | M+0             | [M+H]+   |                                |                   |                        |                        |                                                     |                   |                        |                        |
|                      | +ve | 882.605  | M+0             | [M+NH4]+ |                                |                   |                        |                        |                                                     |                   |                        |                        |
|                      | +ve | 883.607  | M+1             | [M+NH4]+ |                                |                   |                        |                        |                                                     |                   |                        |                        |
|                      | +ve | 887.562  | M+0             | [M+Na]+  |                                |                   |                        |                        |                                                     |                   |                        |                        |
| <b>Glycerolipids</b> |     |          |                 |          |                                |                   |                        |                        |                                                     |                   |                        |                        |
| DG[34:1]             | +ve | 612.575  | M+0             | [M+NH4]+ | 0.08 [0-0.45]                  | p=0.037           | 0.09 [0-0.45]          | 0.06 [0-0.13]          | 0.04 [0-0.51]                                       | n.s.              | 0.03 [0-0.09]          | 0.05 [0-0.51]          |
| TG[50:2]             | +ve | 848.764  | M+0             | [M+NH4]+ | 0.08 [0-0.83]                  | n.s.              | 0.08 [0-0.82]          | 0.03 [0-0.83]          | 0.06 [0-0.70]                                       | n.s.              | 0.07 [0-0.70]          | 0.04 [0-0.17]          |
| TG[50:1]             | +ve | 850.778  | M+0             | [M+NH4]+ | 0.14 [0-1.32]                  | n.s.              | 0.14 [0-0.84]          | 0.09 [0-1.32]          | 0.06 [0-0.72]                                       | n.s.              | 0.06 [0-0.72]          | 0.07 [0-0.35]          |
|                      | +ve | 851.782  | M+1             | [M+NH4]+ |                                |                   |                        |                        |                                                     |                   |                        |                        |
|                      | +ve | 855.727  | M+0             | [M+Na]+  |                                |                   |                        |                        |                                                     |                   |                        |                        |
|                      | +ve | 856.724* | M+1             | [M+Na]+  |                                |                   |                        |                        |                                                     |                   |                        |                        |
| TG[50:0]             | +ve | 852.787  | M+0             | [M+NH4]+ | 0.06 [0-1.15]                  | n.s.              | 0.07 [0-1.15]          | 0.06 [0-0.40]          | 0.03 [0-0.21]                                       | n.s.              | 0.03 [0-0.21]          | 0.06 [0-0.09]          |
| TG[52:4]             | +ve | 872.756  | M+0             | [M+NH4]+ | 0.10 [0-0.56]                  | n.s.              | 0.12 [0-0.27]          | 0.07 [0-0.56]          | 0.04 [0-0.31]                                       | n.s.              | 0.04 [0-0.28]          | 0.05 [0-0.31]          |
|                      | +ve | 873.759  | M+1             | [M+NH4]+ |                                |                   |                        |                        |                                                     |                   |                        |                        |
| TG[52:3]             | +ve | 874.778  | M+0             | [M+NH4]+ | 0.13 [0-0.72]                  | n.s.              | 0.20 [0-0.72]          | 0.10 [0-0.58]          | 0.08 [0-0.62]                                       | n.s.              | 0.07 [0-0.62]          | 0.08 [0-0.18]          |
|                      | +ve | 875.779  | M+1             | [M+NH4]+ |                                |                   |                        |                        |                                                     |                   |                        |                        |
| TG[52:2]             | +ve | 876.795  | M+0             | [M+NH4]+ | 0.14 [0-1.37]                  | n.s.              | 0.15 [0-0.99]          | 0.13 [0-1.37]          | 0.07 [0-0.85]                                       | n.s.              | 0.06 [0-0.85]          | 0.12 [0-0.35]          |
|                      | +ve | 877.799  | M+1             | [M+NH4]+ |                                |                   |                        |                        |                                                     |                   |                        |                        |
|                      | +ve | 881.747  | M+0             | [M+Na]+  |                                |                   |                        |                        |                                                     |                   |                        |                        |
| TG[52:1]             | +ve | 878.806  | M+0             | [M+NH4]+ | 0.08 [0-0.71]                  | n.s.              | 0.10 [0-0.45]          | 0.04 [0-0.71]          | 0.04 [0-0.39]                                       | n.s.              | 0.03 [0-0.39]          | 0.04 [0-0.19]          |
| TG[54:5]             | +ve | 898.768  | M+0             | [M+NH4]+ | 0.10 [0-1.16]                  | n.s.              | 0.09 [0-0.26]          | 0.11 [0-1.16]          | 0.04 [0-1.14]                                       | n.s.              | 0.04 [0-1.14]          | 0.06 [0-0.18]          |
| TG[54:4]             | +ve | 900.792  | M+0             | [M+NH4]+ | 0.07 [0-1.55]                  | n.s.              | 0.07 [0-0.32]          | 0.06 [0-1.55]          | 0.04 [0-1.52]                                       | n.s.              | 0.04 [0-1.52]          | 0.05 [0-0.19]          |
|                      | +ve | 901.797  | M+1             | [M+NH4]+ |                                |                   |                        |                        |                                                     |                   |                        |                        |
| TG[54:3]             | +ve | 902.812  | M+0             | [M+NH4]+ | 0.13 [0-1.91]                  | n.s.              | 0.13 [0-0.49]          | 0.07 [0-1.91]          | 0.07 [0-1.88]                                       | n.s.              | 0.07 [0-1.88]          | 0.06 [0-0.22]          |
|                      | +ve | 903.812  | M+1             | [M+NH4]+ |                                |                   |                        |                        |                                                     |                   |                        |                        |
| TG[54:2]             | +ve | 904.824  | M+0             | [M+NH4]+ | 0.07 [0-0.45]                  | n.s.              | 0.09 [0-0.19]          | 0.07 [0-0.45]          | 0.03 [0-0.44]                                       | n.s.              | 0.03 [0-0.44]          | 0.05 [0-0.15]          |
| <b>Sterol lipids</b> |     |          |                 |          |                                |                   |                        |                        |                                                     |                   |                        |                        |
| Cholesterol          | +ve | 369.352  | M+0             | [M-OH]+  | 1.89 [0.52-14.52]              | p<0.001           | 2.88 [1.23-14.52]      | 1.08 [0.52-3.88]       | 0.95 [0.09-6.26]                                    | p=0.035           | 0.91 [0.09-5.14]       | 1.63 [0.45-6.26]       |
|                      | +ve | 370.355  | M+1             | [M-OH]+  |                                |                   |                        |                        |                                                     |                   |                        |                        |
|                      | +ve | 404.383  | M+0             | [M+NH4]+ |                                |                   |                        |                        |                                                     |                   |                        |                        |
| a-Tocopherol         | +ve | 431.387  | M+0             | [M+H]+   | 0.04 [0-1.23]                  | p<0.001           | 0.08 [0-1.23]          | 0.02 [0-0.04]          | 0.02 [0-0.10]                                       | n.s.              | 0.02 [0-0.10]          | 0.03 [0-0.07]          |
| CE[16:1]             | +ve | 645.551  | M+0             | [M+NH4]+ | 0.14 [0-1.18]                  | p=0.042           | 0.18 [0-1.18]          | 0.07 [0-0.16]          | 0.08 [0-0.64]                                       | n.s.              | 0.07 [0-0.11]          | 0.17 [0-0.64]          |
| CE[18:2]             | +ve | 666.619  | M+0             | [M+NH4]+ | 0.22 [0-1.89]                  | p<0.001           | 0.49 [0-1.89]          | 0.11 [0-0.72]          | 0.11 [0-0.67]                                       | n.s.              | 0.11 [0-0.65]          | 0.13 [0-0.67]          |
|                      | +ve | 667.621  | M+1             | [M+NH4]+ |                                |                   |                        |                        |                                                     |                   |                        |                        |
|                      | +ve | 671.575  | M+0             | [M+Na]+  |                                |                   |                        |                        |                                                     |                   |                        |                        |
|                      | +ve | 672.575  | M+1             | [M+Na]+  |                                |                   |                        |                        |                                                     |                   |                        |                        |
|                      | +ve | 687.546  | M+0             | [M+K]+   |                                |                   |                        |                        |                                                     |                   |                        |                        |
|                      | +ve | 688.543  | M+1             | [M+K]+   |                                |                   |                        |                        |                                                     |                   |                        |                        |

Continued

| Lipid                                     |     |          |                 |                      | Relative abundance (% of DPPC) |                   |                        |                        | Abundance (µM normalised to DMPC internal standard) |                   |                        |                        |
|-------------------------------------------|-----|----------|-----------------|----------------------|--------------------------------|-------------------|------------------------|------------------------|-----------------------------------------------------|-------------------|------------------------|------------------------|
| Assignment                                | ESI | m/z      | Mass isotopomer | Ion                  | All samples median [range]     | MW U test p-value | Group A median [range] | Group B median [range] | All samples median [range]                          | MW U test p-value | Group A median [range] | Group B median [range] |
| CE[18:1]                                  | +ve | 668.627  | M+0             | [M+NH4] <sup>+</sup> | 0.13 [0-4.50]                  | p=0.005           | 0.20 [0-4.50]          | 0.09 [0-0.32]          | 0.06 [0-0.61]                                       | n.s.              | 0.06 [0-0.46]          | 0.07 [0-0.61]          |
|                                           | +ve | 669.628  | M+1             | [M+NH4] <sup>+</sup> |                                |                   |                        |                        |                                                     |                   |                        |                        |
|                                           | +ve | 673.588  | M+0             | [M+Na] <sup>+</sup>  |                                |                   |                        |                        |                                                     |                   |                        |                        |
|                                           | +ve | 689.556  | M+0             | [M+K] <sup>+</sup>   |                                |                   |                        |                        |                                                     |                   |                        |                        |
| <b>Sphingolipids</b>                      |     |          |                 |                      |                                |                   |                        |                        |                                                     |                   |                        |                        |
| Putative Cer                              | +ve | 520.507  | NA              | NA                   | 0.17 [0-0.91]                  | p<0.001           | 0.31 [0-0.91]          | 0.09 [0.02-0.20]       | 0.09 [0-0.78]                                       | n.s.              | 0.09 [0-0.43]          | 0.11 [0.04-0.78]       |
|                                           | +ve | 521.512  | NA              | NA                   |                                |                   |                        |                        |                                                     |                   |                        |                        |
| Cer[d18:1/16:0]                           | +ve | 538.524  | M+0             | [M+H] <sup>+</sup>   | 0.07 [0-0.94]                  | p<0.001           | 0.14 [0-0.94]          | 0.04 [0-0.09]          | 0.04 [0-0.43]                                       | n.s.              | 0.04 [0-0.43]          | 0.05 [0-0.39]          |
|                                           | +ve | 539.529  | M+1             | [M+H] <sup>+</sup>   |                                |                   |                        |                        |                                                     |                   |                        |                        |
|                                           | +ve | 560.504  | M+0             | [M+Na] <sup>+</sup>  |                                |                   |                        |                        |                                                     |                   |                        |                        |
| Cer[d18:0/16:0]                           | +ve | 540.535  | M+0             | [M+H] <sup>+</sup>   | 0.06 [0-0.09]                  | p=0.010           | 0.07 [0-0.09]          | 0.03 [0-0.07]          | 0.02 [0-0.10]                                       | n.s.              | 0.02 [0-0.04]          | 0.03 [0-0.10]          |
| Cer[d18:1/18:1]                           | +ve | 564.357  | M+0             | [M+H] <sup>+</sup>   | 0.11 [0-1.66]                  | n.s.              | 0.14 [0-1.66]          | 0.10 [0-0.50]          | 0.04 [0-2.00]                                       | p=0.004           | 0.03 [0-0.41]          | 0.16 [0-2.00]          |
| Cer[d18:1/18:0]                           | +ve | 566.554  | M+0             | [M+H] <sup>+</sup>   | 0.06 [0-1.85]                  | p=0.011           | 0.09 [0-1.85]          | 0.04 [0-0.09]          | 0.03 [0-0.85]                                       | n.s.              | 0.03 [0-0.85]          | 0.06 [0-0.38]          |
|                                           | +ve | 588.536  | M+0             | [M+Na] <sup>+</sup>  |                                |                   |                        |                        |                                                     |                   |                        |                        |
| HexCer[d18:1/16:0]                        | +ve | 717.553* | M+0             | [M+NH4] <sup>+</sup> | 0.07 [0-0.36]                  | p=0.017           | 0.09 [0-0.36]          | 0.06 [0.03-0.22]       | 0.04 [0-0.58]                                       | p<0.001           | 0.03 [0-0.11]          | 0.09 [0.02-0.58]       |
|                                           | +ve | 718.558* | M+1             | [M+NH4] <sup>+</sup> |                                |                   |                        |                        |                                                     |                   |                        |                        |
| Putative HexCer                           | +ve | 728.526  | M+0             | [M+H] <sup>+</sup>   | 0.86 [0.48-1.76]               | n.s.              | 0.80 [0.48-1.76]       | 0.94 [0.61-1.36]       | 0.42 [0.04-4.21]                                    | p<0.001           | 0.29 [0.04-0.60]       | 1.56 [0.42-4.21]       |
| SM[d18:1/14:0]                            | +ve | 675.544  | M+0             | [M+H] <sup>+</sup>   | 0.06 [0-0.42]                  | n.s.              | 0.08 [0-0.42]          | 0.04 [0-0.26]          | 0.04 [0-0.56]                                       | n.s.              | 0.03 [0-0.13]          | 0.07 [0-0.56]          |
| SM[d18:1/16:0]                            | +ve | 703.572  | M+0             | [M+H] <sup>+</sup>   | 0.76 [0.27-6.37]               | p=0.002           | 1.20 [0.38-6.37]       | 0.56 [0.27-1.19]       | 0.40 [0.11-3.74]                                    | p<0.001           | 0.33 [0.11-0.90]       | 0.69 [0.25-3.74]       |
|                                           | +ve | 704.564* | M+1             | [M+H] <sup>+</sup>   |                                |                   |                        |                        |                                                     |                   |                        |                        |
|                                           | +ve | 705.578* | M+2             | [M+H] <sup>+</sup>   |                                |                   |                        |                        |                                                     |                   |                        |                        |
| SM[d18:1/18:0]                            | +ve | 731.603* | M+0             | [M+H] <sup>+</sup>   | 0.27 [0-1.28]                  | n.s.              | 0.34 [0-1.28]          | 0.22 [0-0.27]          | 0.07 [0-0.96]                                       | p=0.018           | 0.05 [0-0.19]          | 0.25 [0-0.96]          |
|                                           | +ve | 732.554* | M+1             | [M+H] <sup>+</sup>   |                                |                   |                        |                        |                                                     |                   |                        |                        |
| Putative SM                               | +ve | 801.678  | M+0             | NA                   | 0.07 [0-0.41]                  | p=0.005           | 0.09 [0-0.41]          | 0.05 [0-0.14]          | 0.03 [0-0.45]                                       | p=0.006           | 0.02 [0-0.09]          | 0.05 [0-0.45]          |
|                                           | +ve | 802.676  | M+1             | NA                   |                                |                   |                        |                        |                                                     |                   |                        |                        |
| SM[d18:1/24:1]                            | +ve | 813.681  | M+0             | [M+H] <sup>+</sup>   | 0.25 [0.08-2.36]               | p=0.005           | 0.36 [0.08-2.36]       | 0.19 [0.09-0.48]       | 0.12 [0.03-1.14]                                    | p<0.001           | 0.10 [0.03-0.29]       | 0.23 [0.10-1.14]       |
|                                           | +ve | 814.680  | M+1             | [M+H] <sup>+</sup>   |                                |                   |                        |                        |                                                     |                   |                        |                        |
| SM[d18:1/24:0]                            | +ve | 815.694  | M+0             | [M+H] <sup>+</sup>   | 0.17 [0-1.47]                  | p=0.002           | 0.22 [0-1.47]          | 0.13 [0.06-0.31]       | 0.09 [0-0.76]                                       | p<0.001           | 0.06 [0-0.15]          | 0.15 [0.06-0.76]       |
|                                           | +ve | 816.702  | M+1             | [M+H] <sup>+</sup>   |                                |                   |                        |                        |                                                     |                   |                        |                        |
|                                           | +ve | 817.688  | M+2             | [M+H] <sup>+</sup>   |                                |                   |                        |                        |                                                     |                   |                        |                        |
| <b>Unidentified ions and contaminants</b> |     |          |                 |                      |                                |                   |                        |                        |                                                     |                   |                        |                        |
| Unknown                                   | +ve | 374.308  | NA              | NA                   | 0.09 [0-1.63]                  | p=0.003           | 0.15 [0-1.63]          | 0.04 [0-0.19]          | 0.04 [0-0.15]                                       | n.s.              | 0.03 [0-0.15]          | 0.06 [0-0.13]          |
| Unknown                                   | +ve | 386.761  | NA              | NA                   | 0.05 [0-0.11]                  | p<0.001           | 0.06 [0-0.11]          | 0.04 [0-0.06]          | 0.04 [0-0.14]                                       | p<0.001           | 0.02 [0-0.06]          | 0.08 [0-0.14]          |
| Unknown                                   | +ve | 388.343  | NA              | NA                   | 0.54 [0-5.73]                  | n.s.              | 0.54 [0-5.73]          | 0.44 [0-1.00]          | 0.19 [0-0.79]                                       | n.s.              | 0.18 [0-0.79]          | 0.42 [0-0.55]          |
| Unknown                                   | +ve | 389.773  | NA              | NA                   | 0.05 [0-0.22]                  | n.s.              | 0.06 [0-0.22]          | 0.05 [0-0.09]          | 0.03 [0-0.13]                                       | p=0.005           | 0.02 [0-0.04]          | 0.04 [0-0.13]          |
| Unknown                                   | +ve | 423.248  | NA              | NA                   | 0.14 [0-1.05]                  | p<0.001           | 0.20 [0.05-1.05]       | 0.06 [0-0.33]          | 0.06 [0-0.50]                                       | n.s.              | 0.06 [0.02-0.21]       | 0.11 [0-0.50]          |
| Unknown                                   | +ve | 440.270  | NA              | NA                   | 0.14 [0-1.43]                  | p<0.001           | 0.19 [0.07-1.43]       | 0.06 [0-0.43]          | 0.08 [0-0.33]                                       | n.s.              | 0.08 [0.02-0.29]       | 0.11 [0-0.33]          |
| Unknown                                   | +ve | 445.224  | NA              | NA                   | 0.15 [0-1.39]                  | p=0.002           | 0.32 [0-1.39]          | 0.06 [0-0.68]          | 0.07 [0-0.30]                                       | n.s.              | 0.08 [0-0.30]          | 0.06 [0-0.21]          |
| Unknown                                   | +ve | 467.206  | NA              | NA                   | 0.10 [0-1.11]                  | p=0.023           | 0.22 [0-1.11]          | 0.05 [0-0.62]          | 0.05 [0-0.28]                                       | n.s.              | 0.04 [0-0.28]          | 0.05 [0-0.21]          |
| Unknown                                   | +ve | 549.508  | NA              | NA                   | 0.08 [0-2.04]                  | n.s.              | 0.14 [0-2.04]          | 0.06 [0-0.43]          | 0.05 [0-0.40]                                       | n.s.              | 0.04 [0-0.18]          | 0.11 [0-0.40]          |
| Unknown                                   | +ve | 551.506  | NA              | NA                   | 0.18 [0-1.02]                  | p=0.030           | 0.23 [0-1.02]          | 0.16 [0.03-0.31]       | 0.11 [0-0.50]                                       | p<0.001           | 0.05 [0-0.17]          | 0.21 [0.03-0.50]       |
| Unknown                                   | +ve | 575.508  | NA              | NA                   | 0.08 [0-1.10]                  | n.s.              | 0.10 [0-1.10]          | 0.08 [0.03-0.16]       | 0.06 [0-0.41]                                       | p<0.001           | 0.03 [0-0.24]          | 0.14 [0.03-0.41]       |
| Unknown                                   | +ve | 577.519  | NA              | NA                   | 0.71 [0-1.35]                  | n.s.              | 0.68 [0-1.35]          | 0.72 [0.20-1.24]       | 0.44 [0-2.87]                                       | p<0.001           | 0.21 [0-0.62]          | 1.25 [0.44-2.87]       |
| Unknown                                   | +ve | 578.524  | NA              | NA                   | 0.27 [0-0.54]                  | n.s.              | 0.25 [0-0.54]          | 0.28 [0.07-0.45]       | 0.18 [0-1.14]                                       | p<0.001           | 0.10 [0-0.23]          | 0.53 [0.16-1.14]       |
| Unknown                                   | +ve | 579.534  | NA              | NA                   | 0.10 [0-0.29]                  | n.s.              | 0.11 [0-0.29]          | 0.10 [0.07-0.18]       | 0.07 [0-0.60]                                       | p<0.001           | 0.03 [0-0.13]          | 0.21 [0.06-0.60]       |
| Unknown                                   | +ve | 601.521  | NA              | NA                   | 0.07 [0-0.55]                  | n.s.              | 0.07 [0-0.55]          | 0.07 [0-0.35]          | 0.05 [0-0.47]                                       | p=0.028           | 0.03 [0-0.17]          | 0.07 [0.02-0.47]       |
| Unknown                                   | +ve | 603.535  | NA              | NA                   | 0.30 [0-1.20]                  | n.s.              | 0.26 [0-1.20]          | 0.31 [0.12-0.61]       | 0.18 [0-1.39]                                       | p<0.001           | 0.08 [0-0.26]          | 0.52 [0.19-1.39]       |
| Unknown                                   | +ve | 604.542  | NA              | NA                   | 0.13 [0-0.48]                  | n.s.              | 0.11 [0-0.48]          | 0.15 [0-0.25]          | 0.09 [0-0.74]                                       | p<0.001           | 0.04 [0-0.13]          | 0.25 [0.08-0.74]       |
| Unknown                                   | +ve | 605.550  | NA              | NA                   | 0.43 [0-0.85]                  | n.s.              | 0.40 [0-0.85]          | 0.44 [0.23-0.79]       | 0.23 [0-2.04]                                       | p<0.001           | 0.13 [0-0.27]          | 0.73 [0.26-2.04]       |

Continued

| Lipid      |     |         |                 |     | Relative abundance (% of DPPC) |                   |                        |                        | Abundance (µM normalised to DMPC internal standard) |                   |                        |                        |
|------------|-----|---------|-----------------|-----|--------------------------------|-------------------|------------------------|------------------------|-----------------------------------------------------|-------------------|------------------------|------------------------|
| Assignment | ESI | m/z     | Mass isotopomer | Ion | All samples median [range]     | MW U test p-value | Group A median [range] | Group B median [range] | All samples median [range]                          | MW U test p-value | Group A median [range] | Group B median [range] |
| Unknown    | +ve | 606.551 | NA              | NA  | 0.17 [0-0.31]                  | n.s.              | 0.17 [0-0.31]          | 0.17 [0.08-0.30]       | 0.09 [0-0.96]                                       | p<0.001           | 0.05 [0-0.10]          | 0.31 [0.09-0.96]       |
| Unknown    | +ve | 627.556 | NA              | NA  | 0.05 [0-0.70]                  | n.s.              | 0.08 [0-0.70]          | 0.04 [0.01-0.20]       | 0.04 [0-0.57]                                       | n.s.              | 0.04 [0-0.10]          | 0.05 [0.01-0.57]       |
| Unknown    | +ve | 640.591 | NA              | NA  | 0.08 [0-1.86]                  | p=0.005           | 0.12 [0-1.86]          | 0.06 [0-0.14]          | 0.04 [0-0.56]                                       | n.s.              | 0.04 [0-0.16]          | 0.05 [0-0.56]          |
| Unknown    | +ve | 641.592 | NA              | NA  | 0.09 [0-1.26]                  | n.s.              | 0.12 [0-1.26]          | 0.06 [0-0.21]          | 0.04 [0-0.55]                                       | n.s.              | 0.04 [0-0.10]          | 0.11 [0-0.55]          |
| Unknown    | +ve | 642.604 | NA              | NA  | 0.09 [0-0.57]                  | n.s.              | 0.09 [0-0.57]          | 0.06 [0-0.32]          | 0.03 [0-0.56]                                       | n.s.              | 0.03 [0-0.16]          | 0.04 [0-0.56]          |
| Unknown    | +ve | 648.659 | NA              | NA  | 0.06 [0-0.18]                  | n.s.              | 0.07 [0-0.18]          | 0.06 [0-0.14]          | 0.02 [0-0.56]                                       | p=0.001           | 0.02 [0-0.06]          | 0.14 [0-0.56]          |
| Unknown    | +ve | 662.569 | NA              | NA  | 0.06 [0-0.19]                  | n.s.              | 0.07 [0-0.19]          | 0.03 [0-0.14]          | 0.02 [0-0.58]                                       | p=0.033           | 0.02 [0-0.06]          | 0.11 [0-0.58]          |
| Unknown    | +ve | 664.596 | NA              | NA  | 0.06 [0-0.31]                  | n.s.              | 0.07 [0-0.31]          | 0.05 [0-0.12]          | 0.03 [0-0.55]                                       | p=0.001           | 0.02 [0-0.12]          | 0.09 [0-0.55]          |
| Unknown    | +ve | 671.445 | NA              | NA  | 0.18 [0-4.71]                  | p=0.002           | 0.33 [0-4.71]          | 0.09 [0-0.39]          | 0.08 [0-0.90]                                       | p=0.025           | 0.07 [0-0.18]          | 0.16 [0-0.90]          |
| Unknown    | +ve | 672.447 | NA              | NA  | 0.14 [0-2.23]                  | p=0.020           | 0.16 [0-2.23]          | 0.08 [0-0.25]          | 0.05 [0-1.01]                                       | p=0.006           | 0.03 [0-0.08]          | 0.08 [0-1.01]          |
| Unknown    | +ve | 695.575 | NA              | NA  | 0.10 [0-0.91]                  | n.s.              | 0.13 [0-0.76]          | 0.06 [0-0.26]          | 0.05 [0-0.28]                                       | n.s.              | 0.04 [0-0.28]          | 0.09 [0-0.20]          |
| Unknown    | +ve | 723.536 | NA              | NA  | 0.10 [0-0.23]                  | n.s.              | 0.10 [0-0.23]          | 0.10 [0.06-0.16]       | 0.07 [0-0.66]                                       | p<0.001           | 0.04 [0-0.09]          | 0.19 [0.05-0.66]       |
| Unknown    | +ve | 724.524 | NA              | NA  | 0.21 [0.09-1.08]               | p=0.004           | 0.27 [0.12-1.08]       | 0.16 [0.09-0.31]       | 0.11 [0.01-1.08]                                    | p<0.001           | 0.08 [0.01-0.23]       | 0.23 [0.08-1.08]       |
| Unknown    | +ve | 725.539 | NA              | NA  | 0.13 [0.05-0.74]               | p=0.007           | 0.18 [0.07-0.74]       | 0.11 [0.05-0.21]       | 0.07 [0.02-0.89]                                    | p<0.001           | 0.06 [0.02-0.16]       | 0.14 [0.04-0.89]       |
| Unknown    | +ve | 726.544 | NA              | NA  | 0.12 [0-0.91]                  | p<0.001           | 0.17 [0-0.91]          | 0.10 [0.04-0.18]       | 0.06 [0-0.76]                                       | p<0.001           | 0.05 [0-0.10]          | 0.12 [0.05-0.76]       |
| Unknown    | +ve | 727.528 | NA              | NA  | 0.08 [0-0.39]                  | p=0.002           | 0.10 [0-0.39]          | 0.03 [0-0.11]          | 0.03 [0-0.50]                                       | p=0.006           | 0.03 [0-0.04]          | 0.04 [0-0.50]          |
| Unknown    | +ve | 729.533 | NA              | NA  | 0.40 [0.23-1.27]               | n.s.              | 0.40 [0.23-1.27]       | 0.40 [0.26-0.60]       | 0.20 [0.03-1.84]                                    | p<0.001           | 0.14 [0.03-0.29]       | 0.69 [0.19-1.84]       |
| Unknown    | +ve | 752.557 | NA              | NA  | 0.29 [0.13-1.68]               | p=0.001           | 0.38 [0.19-1.68]       | 0.23 [0.13-0.43]       | 0.15 [0.03-1.35]                                    | p<0.001           | 0.12 [0.03-0.29]       | 0.38 [0.12-1.35]       |
| Unknown    | +ve | 753.561 | NA              | NA  | 0.10 [0-0.51]                  | n.s.              | 0.11 [0-0.51]          | 0.10 [0.05-0.21]       | 0.06 [0-0.84]                                       | p<0.001           | 0.05 [0-0.12]          | 0.18 [0.04-0.84]       |
| Unknown    | +ve | 770.575 | NA              | NA  | 0.34 [0.23-1.19]               | n.s.              | 0.34 [0.23-1.19]       | 0.35 [0.24-0.50]       | 0.18 [0.03-1.67]                                    | p<0.001           | 0.11 [0.03-0.24]       | 0.64 [0.16-1.67]       |
| Unknown    | +ve | 779.591 | NA              | NA  | 0.09 [0-0.96]                  | n.s.              | 0.17 [0-0.96]          | 0.07 [0.03-0.16]       | 0.06 [0-0.63]                                       | p<0.001           | 0.03 [0-0.09]          | 0.14 [0.03-0.63]       |
| Unknown    | +ve | 799.557 | NA              | NA  | 0.13 [0-0.53]                  | n.s.              | 0.17 [0-0.53]          | 0.13 [0-0.29]          | 0.11 [0-0.63]                                       | p=0.002           | 0.05 [0-0.12]          | 0.18 [0.04-0.63]       |
| Unknown    | +ve | 800.562 | NA              | NA  | 0.08 [0-0.18]                  | n.s.              | 0.07 [0-0.17]          | 0.08 [0.03-0.18]       | 0.06 [0-0.50]                                       | p<0.001           | 0.03 [0-0.06]          | 0.11 [0.03-0.50]       |
| Unknown    | +ve | 800.659 | NA              | NA  | 0.07 [0-0.18]                  | n.s.              | 0.09 [0-0.18]          | 0.07 [0-0.11]          | 0.03 [0-0.44]                                       | n.s.              | 0.03 [0-0.06]          | 0.14 [0-0.44]          |
| Unknown    | +ve | 802.564 | NA              | NA  | 0.06 [0-0.15]                  | n.s.              | 0.07 [0-0.15]          | 0.06 [0.03-0.11]       | 0.04 [0-0.30]                                       | p<0.001           | 0.03 [0-0.06]          | 0.09 [0-0.30]          |
| Unknown    | +ve | 803.672 | NA              | NA  | 0.11 [0-0.55]                  | p<0.001           | 0.15 [0-0.55]          | 0.07 [0-0.11]          | 0.04 [0-0.45]                                       | p=0.010           | 0.02 [0-0.05]          | 0.09 [0-0.45]          |
| Unknown    | +ve | 821.529 | NA              | NA  | 0.08 [0-0.16]                  | n.s.              | 0.10 [0-0.15]          | 0.07 [0.03-0.16]       | 0.05 [0-0.47]                                       | p<0.001           | 0.03 [0-0.07]          | 0.10 [0.03-0.47]       |
| Unknown    | +ve | 822.527 | NA              | NA  | 0.12 [0-0.24]                  | n.s.              | 0.12 [0-0.24]          | 0.12 [0.09-0.18]       | 0.07 [0-0.64]                                       | p<0.001           | 0.04 [0-0.11]          | 0.22 [0.07-0.64]       |
| Unknown    | +ve | 823.533 | NA              | NA  | 0.08 [0-0.15]                  | n.s.              | 0.08 [0-0.15]          | 0.08 [0.05-0.12]       | 0.04 [0-0.47]                                       | p<0.001           | 0.03 [0-0.07]          | 0.14 [0.04-0.47]       |
| Unknown    | +ve | 824.539 | NA              | NA  | 0.57 [0.34-1.18]               | n.s.              | 0.57 [0.34-1.18]       | 0.58 [0.41-0.80]       | 0.29 [0.03-2.46]                                    | p<0.001           | 0.16 [0.03-0.50]       | 1.02 [0.27-2.46]       |
| Unknown    | +ve | 825.543 | NA              | NA  | 0.27 [0.16-0.67]               | n.s.              | 0.27 [0.16-0.67]       | 0.27 [0.19-0.37]       | 0.14 [0.02-1.24]                                    | p<0.001           | 0.08 [0.02-0.23]       | 0.49 [0.14-1.24]       |
| Unknown    | +ve | 826.548 | NA              | NA  | 0.10 [0-0.18]                  | n.s.              | 0.11 [0-0.18]          | 0.09 [0.07-0.15]       | 0.06 [0-0.56]                                       | p<0.001           | 0.05 [0-0.10]          | 0.18 [0.05-0.56]       |
| Unknown    | +ve | 830.570 | NA              | NA  | 0.07 [0-0.12]                  | n.s.              | 0.08 [0-0.12]          | 0.07 [0-0.11]          | 0.04 [0-0.37]                                       | p<0.001           | 0.03 [0-0.05]          | 0.08 [0-0.37]          |
| Unknown    | +ve | 836.548 | NA              | NA  | 0.08 [0-0.41]                  | n.s.              | 0.10 [0-0.41]          | 0.07 [0-0.16]          | 0.05 [0-0.60]                                       | p=0.020           | 0.04 [0-0.12]          | 0.11 [0-0.60]          |
| Unknown    | +ve | 837.549 | NA              | NA  | 0.12 [0-0.31]                  | p=0.030           | 0.16 [0-0.31]          | 0.11 [0.05-0.23]       | 0.06 [0-0.61]                                       | p<0.001           | 0.05 [0-0.08]          | 0.18 [0.04-0.61]       |
| Unknown    | +ve | 838.554 | NA              | NA  | 0.10 [0-0.30]                  | n.s.              | 0.11 [0-0.30]          | 0.09 [0.05-0.19]       | 0.06 [0-0.55]                                       | p<0.001           | 0.05 [0-0.08]          | 0.19 [0.04-0.55]       |
| Unknown    | +ve | 844.617 | NA              | NA  | 0.09 [0-0.45]                  | p<0.001           | 0.18 [0-0.45]          | 0.06 [0-0.10]          | 0.05 [0-0.40]                                       | p=0.001           | 0.03 [0-0.05]          | 0.08 [0-0.40]          |
| Unknown    | +ve | 848.539 | NA              | NA  | 0.07 [0-0.13]                  | n.s.              | 0.07 [0-0.13]          | 0.07 [0.04-0.11]       | 0.05 [0-0.41]                                       | p<0.001           | 0.03 [0-0.06]          | 0.12 [0.04-0.41]       |
| Unknown    | +ve | 850.554 | NA              | NA  | 0.12 [0-0.23]                  | n.s.              | 0.12 [0-0.23]          | 0.12 [0.10-0.17]       | 0.07 [0-0.62]                                       | p<0.001           | 0.05 [0-0.12]          | 0.23 [0.07-0.62]       |
| Unknown    | +ve | 851.559 | NA              | NA  | 0.08 [0-0.36]                  | n.s.              | 0.08 [0-0.36]          | 0.08 [0.06-0.11]       | 0.04 [0-0.42]                                       | p<0.001           | 0.03 [0-0.10]          | 0.14 [0.04-0.42]       |
| Unknown    | +ve | 852.566 | NA              | NA  | 0.07 [0-0.26]                  | n.s.              | 0.08 [0-0.26]          | 0.06 [0.05-0.10]       | 0.04 [0-0.38]                                       | p<0.001           | 0.02 [0-0.05]          | 0.11 [0.04-0.38]       |
| Unknown    | +ve | 854.576 | NA              | NA  | 0.06 [0-0.15]                  | n.s.              | 0.06 [0-0.11]          | 0.06 [0-0.15]          | 0.04 [0-0.34]                                       | p<0.001           | 0.03 [0-0.05]          | 0.10 [0-0.34]          |
| Unknown    | +ve | 858.527 | NA              | NA  | 0.06 [0-0.13]                  | n.s.              | 0.07 [0-0.13]          | 0.06 [0-0.10]          | 0.03 [0-0.42]                                       | p=0.002           | 0.03 [0-0.05]          | 0.09 [0-0.42]          |
| Unknown    | +ve | 858.715 | NA              | NA  | 0.06 [0-0.13]                  | n.s.              | 0.06 [0-0.13]          | 0.05 [0-0.08]          | 0.03 [0-0.22]                                       | p=0.001           | 0.02 [0-0.05]          | 0.04 [0-0.22]          |
| Unknown    | +ve | 861.544 | NA              | NA  | 0.06 [0-0.11]                  | p=0.014           | 0.07 [0-0.11]          | 0.05 [0-0.09]          | 0.04 [0-0.34]                                       | p=0.009           | 0.02 [0-0.04]          | 0.08 [0-0.34]          |
| Unknown    | +ve | 862.626 | NA              | NA  | 0.07 [0-0.74]                  | p=0.042           | 0.09 [0-0.74]          | 0.04 [0-0.11]          | 0.03 [0-0.39]                                       | n.s.              | 0.03 [0-0.07]          | 0.07 [0-0.39]          |
| Unknown    | +ve | 866.585 | NA              | NA  | 0.06 [0-0.17]                  | n.s.              | 0.06 [0-0.14]          | 0.07 [0.03-0.17]       | 0.04 [0-0.41]                                       | p<0.001           | 0.02 [0-0.05]          | 0.10 [0.03-0.41]       |
| Unknown    | +ve | 868.687 | NA              | NA  | 0.09 [0-0.57]                  | n.s.              | 0.09 [0-0.57]          | 0.06 [0-0.21]          | 0.03 [0-0.28]                                       | p=0.002           | 0.02 [0-0.07]          | 0.08 [0-0.28]          |
| Unknown    | +ve | 869.694 | NA              | NA  | 0.06 [0-0.14]                  | n.s.              | 0.07 [0-0.14]          | 0.05 [0-0.11]          | 0.03 [0-0.20]                                       | p=0.022           | 0.02 [0-0.06]          | 0.05 [0-0.20]          |
| Unknown    | +ve | 876.562 | NA              | NA  | 0.06 [0-0.11]                  | n.s.              | 0.06 [0-0.11]          | 0.05 [0.03-0.10]       | 0.04 [0-0.35]                                       | p<0.001           | 0.02 [0-0.08]          | 0.09 [0.02-0.35]       |

Continued

| Lipid       |     |          |                 |     | Relative abundance (% of DPPC) |                   |                        |                        | Abundance (µM normalised to DMPC internal standard) |                   |                        |                        |
|-------------|-----|----------|-----------------|-----|--------------------------------|-------------------|------------------------|------------------------|-----------------------------------------------------|-------------------|------------------------|------------------------|
| Assignment  | ESI | m/z      | Mass isotopomer | Ion | All samples median [range]     | MW U test p-value | Group A median [range] | Group B median [range] | All samples median [range]                          | MW U test p-value | Group A median [range] | Group B median [range] |
| Unknown     | +ve | 884.607  | NA              | NA  | 0.03 [0-0.08]                  | n.s.              | 0.05 [0-0.08]          | 0.03 [0-0.07]          | 0.02 [0-0.22]                                       | p=0.005           | 0.02 [0-0.03]          | 0.05 [0-0.22]          |
| Unknown     | +ve | 886.560  | NA              | NA  | 0.11 [0-0.63]                  | p<0.001           | 0.15 [0-0.63]          | 0.08 [0.04-0.16]       | 0.07 [0-0.34]                                       | p<0.001           | 0.04 [0-0.22]          | 0.12 [0.05-0.34]       |
| Unknown     | +ve | 888.567  | NA              | NA  | 0.05 [0-0.11]                  | n.s.              | 0.05 [0-0.10]          | 0.05 [0-0.11]          | 0.04 [0-0.28]                                       | p=0.002           | 0.03 [0-0.05]          | 0.06 [0.02-0.28]       |
| Unknown     | +ve | 889.587  | NA              | NA  | 0.05 [0-0.67]                  | n.s.              | 0.08 [0-0.67]          | 0.03 [0-0.12]          | 0.03 [0-0.24]                                       | p=0.030           | 0.02 [0-0.10]          | 0.05 [0-0.24]          |
| Unknown     | +ve | 892.530  | NA              | NA  | 0.06 [0-0.12]                  | p=0.041           | 0.06 [0-0.12]          | 0.05 [0.03-0.09]       | 0.04 [0-0.35]                                       | p<0.001           | 0.03 [0-0.07]          | 0.09 [0.02-0.35]       |
| Unknown     | +ve | 900.578  | NA              | NA  | 0.05 [0-0.11]                  | p=0.002           | 0.07 [0-0.11]          | 0.05 [0-0.07]          | 0.03 [0-0.28]                                       | p<0.001           | 0.02 [0-0.05]          | 0.06 [0-0.28]          |
| Unknown     | +ve | 902.570  | NA              | NA  | 0.06 [0-0.61]                  | p=0.011           | 0.08 [0-0.61]          | 0.05 [0.02-0.08]       | 0.04 [0-0.27]                                       | p<0.001           | 0.02 [0-0.06]          | 0.08 [0.02-0.27]       |
| Unknown     | +ve | 904.586  | NA              | NA  | 0.06 [0-0.38]                  | p=0.003           | 0.09 [0-0.38]          | 0.05 [0.03-0.16]       | 0.04 [0-0.27]                                       | p<0.001           | 0.03 [0-0.06]          | 0.09 [0.03-0.27]       |
| Unknown     | +ve | 905.591  | NA              | NA  | 0.05 [0-0.24]                  | n.s.              | 0.07 [0-0.24]          | 0.04 [0-0.10]          | 0.02 [0-0.24]                                       | p=0.003           | 0.02 [0-0.04]          | 0.05 [0-0.24]          |
| Unknown     | +ve | 909.546  | NA              | NA  | 0.05 [0-0.13]                  | n.s.              | 0.07 [0-0.09]          | 0.04 [0-0.13]          | 0.04 [0-0.27]                                       | p=0.003           | 0.02 [0-0.05]          | 0.07 [0-0.27]          |
| Unknown     | +ve | 912.581  | NA              | NA  | 0.08 [0-0.28]                  | p=0.002           | 0.12 [0-0.28]          | 0.06 [0-0.13]          | 0.05 [0-0.24]                                       | p=0.001           | 0.03 [0-0.17]          | 0.08 [0-0.24]          |
| Unknown     | +ve | 914.591  | NA              | NA  | 0.08 [0-0.39]                  | p<0.001           | 0.14 [0-0.39]          | 0.07 [0-0.19]          | 0.07 [0-0.27]                                       | p=0.001           | 0.04 [0-0.27]          | 0.09 [0-0.25]          |
| Unknown     | +ve | 930.602  | NA              | NA  | 0.06 [0-0.23]                  | p=0.001           | 0.07 [0-0.23]          | 0.04 [0-0.07]          | 0.03 [0-0.21]                                       | p<0.001           | 0.02 [0-0.06]          | 0.06 [0-0.21]          |
| Unknown     | +ve | 972.720  | NA              | NA  | 0.08 [0-0.83]                  | p=0.017           | 0.11 [0-0.83]          | 0.07 [0-0.10]          | 0.04 [0-0.29]                                       | p=0.001           | 0.03 [0-0.05]          | 0.10 [0-0.29]          |
| Unknown     | +ve | 973.723  | NA              | NA  | 0.06 [0-0.45]                  | p=0.008           | 0.09 [0-0.45]          | 0.05 [0-0.07]          | 0.03 [0-0.18]                                       | p=0.004           | 0.02 [0-0.03]          | 0.06 [0-0.18]          |
| Unknown     | +ve | 1024.674 | NA              | NA  | 0.06 [0-0.11]                  | NA                | 0.06 [0-0.11]          | 0.04 [0-0.04]          | 0.02 [0-0.03]                                       | NA                | 0.02 [0-0.03]          | not detected           |
| Unknown     | -ve | 421.226  | NA              | NA  | 26.44 [0-431.86]               | n.s.              | 26.32 [0-278.73]       | 26.44 [0-431.86]       | 14.54 [0-111.20]                                    | n.s.              | 15.88 [0-111.20]       | 7.95 [0-63.64]         |
| Unknown     | -ve | 422.229  | NA              | NA  | 6.55 [0-93.83]                 | n.s.              | 15.31 [0-59.98]        | 6.33 [0-93.83]         | 3.68 [0-24.16]                                      | n.s.              | 3.68 [0-24.16]         | 3.39 [0-14.26]         |
| Unknown     | -ve | 489.244  | NA              | NA  | 6.70 [0-66.00]                 | n.s.              | 7.23 [0-66.00]         | 3.89 [0-39.37]         | 3.68 [0-12.46]                                      | n.s.              | 3.63 [0-9.10]          | 4.11 [0-12.46]         |
| Unknown     | -ve | 517.283  | NA              | NA  | 4.36 [0-44.23]                 | n.s.              | 5.28 [0-44.23]         | 2.12 [0-25.31]         | 2.06 [0-8.01]                                       | n.s.              | 1.85 [0-6.00]          | 2.66 [0-8.01]          |
| Unknown     | -ve | 582.510  | NA              | NA  | 1.97 [0-16.76]                 | p=0.018           | 4.02 [0-16.76]         | 1.19 [0-5.88]          | 1.11 [0-10.58]                                      | n.s.              | 0.84 [0-5.25]          | 2.21 [0-10.58]         |
| Unknown     | -ve | 768.532  | NA              | NA  | 2.31 [0-29.74]                 | n.s.              | 1.89 [0-29.74]         | 2.61 [0-22.27]         | 2.33 [0-19.74]                                      | p=0.007           | 1.15 [0-5.38]          | 4.10 [0-19.74]         |
| Unknown     | -ve | 777.550  | NA              | NA  | 7.14 [0-9.35]                  | n.s.              | 7.03 [0-9.35]          | 8.03 [0-9.26]          | 2.93 [0-20.15]                                      | p<0.001           | 2.20 [0-5.41]          | 7.99 [0-20.15]         |
| Unknown     | -ve | 836.529  | NA              | NA  | 1.61 [0-9.47]                  | n.s.              | 1.54 [0-9.21]          | 1.99 [0-9.47]          | 1.81 [0-8.66]                                       | p=0.006           | 0.81 [0-2.18]          | 2.59 [0-8.66]          |
| Unknown     | -ve | 846.548  | NA              | NA  | 12.19 [0-17.86]                | n.s.              | 12.29 [0-17.86]        | 12.06 [0-17.08]        | 4.78 [0-24.28]                                      | p<0.001           | 3.02 [0-6.50]          | 10.30 [0-24.28]        |
| Unknown     | -ve | 847.551  | NA              | NA  | 4.92 [0-7.77]                  | n.s.              | 4.78 [0-7.34]          | 5.69 [0-7.77]          | 2.47 [0-11.46]                                      | p<0.001           | 1.61 [0-2.98]          | 4.64 [0-11.46]         |
| Plasticiser | +ve | 637.306  | NA              | NA  | 0.25 [0-3.07]                  | p<0.001           | 0.43 [0-3.07]          | 0.15 [0-0.27]          | 0.11 [0-0.28]                                       | n.s.              | 0.11 [0.05-0.28]       | 0.14 [0-0.22]          |
| Plasticiser | +ve | 638.308  | NA              | NA  |                                |                   |                        |                        |                                                     |                   |                        |                        |
| Plasticiser | +ve | 654.334  | NA              | NA  | 0.28 [0.04-3.68]               | p<0.001           | 0.53 [0.10-3.68]       | 0.20 [0.04-0.35]       | 0.15 [0.06-1.19]                                    | p=0.008           | 0.13 [0.06-0.36]       | 0.23 [0.07-1.19]       |
| Plasticiser | +ve | 655.339  | NA              | NA  |                                |                   |                        |                        |                                                     |                   |                        |                        |
| Plasticiser | +ve | 659.287  | NA              | NA  | 0.09 [0-1.36]                  | p=0.001           | 0.12 [0-1.36]          | 0.05 [0-0.11]          | 0.03 [0-0.10]                                       | n.s.              | 0.03 [0-0.05]          | 0.04 [0-0.10]          |
| Plasticiser | +ve | 771.528  | NA              | NA  | 0.31 [0-1.32]                  | n.s.              | 0.35 [0-1.32]          | 0.22 [0-0.63]          | 0.17 [0-0.97]                                       | p<0.001           | 0.13 [0-0.18]          | 0.38 [0.16-0.97]       |
