# Supplementary material for: Lipid phenotyping of lung epithelial lining fluid in healthy human volunteers
Source: PubMed Central journal article supplement (PMC6153688; doi:10.1007/s11306-018-1412-2), 2018-09-17
Supplement: 11306_2018_1412_MOESM3_ESM.pdf [file 11306_2018_1412_MOESM3_ESM.pdf]

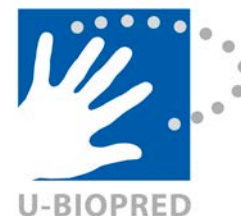

## U-BIOPRED

The U-BIOPRED consortium wishes to acknowledge the help and expertise of the following individuals and groups without whom, the study would not have been possible:

### Definition for the U-BIOPRED Study Group Supplementary authors

Clinical site research leads  
 Platform leads  
 Data cleaning team  
 Data analysis team  
 Scientific Board and Management Board members  
 Core project management staff

### Definition for the U-BIOPRED Study Group Contributors list

Significant involvement in the clinical study

### Use of list:

This list is to be used for all non-core clinical papers.

### Instructions

Follow up clinical papers should re-use the baseline cohort description paper lists, in order to recognize the clinical staff involved in the study.

| U-BIOPRED Supplementary authors |                                                                                                                                             |
|---------------------------------|---------------------------------------------------------------------------------------------------------------------------------------------|
| Name                            | Affiliation                                                                                                                                 |
| Adcock I M                      | National Heart and Lung Institute, Imperial College, London, UK;                                                                            |
| Ahmed H                         | European Institute for Systems Biology and Medicine, CNRS-ENS-UCBL-INSERM, Lyon, France;                                                    |
| Auffray C                       | European Institute for Systems Biology and Medicine, CNRS-ENS-UCBL-INSERM, Lyon, France;                                                    |
| Bakke P                         | Department of Clinical Science, University of Bergen, Bergen, Norway;                                                                       |
| Bansal A T                      | Acclarogen Ltd, St. John's Innovation Centre, Cambridge, UK;                                                                                |
| Baribaud F                      | Janssen R&D, USA;                                                                                                                           |
| Bates S                         | Respiratory Therapeutic Unit, GSK, London, UK;                                                                                              |
| Bel E H                         | Academic Medical Centre, University of Amsterdam, Amsterdam, The Netherlands;                                                               |
| Bigler J                        | <i>Previously Amgen Inc</i>                                                                                                                 |
| Bisgaard H                      | COPSAC, Copenhagen Prospective Studies on Asthma in Childhood, Herlev and Gentofte Hospital, University of Copenhagen, Copenhagen, Denmark  |
| Boedigheimer M J                | Amgen Inc.; Thousand Oaks, USA                                                                                                              |
| Bønnelykke K                    | COPSAC, Copenhagen Prospective Studies on Asthma in Childhood, Herlev and Gentofte Hospital, University of Copenhagen, Copenhagen, Denmark; |
| Brandsma J                      | University of Southampton, Southampton, UK                                                                                                  |
| Brinkman P                      | Academic Medical Centre, University of Amsterdam, Amsterdam, The Netherlands;                                                               |
| Bucchioni E                     | Chiesi Pharmaceuticals SPA, Parma, Italy                                                                                                    |
| Burg D                          | Centre for Proteomic Research, Institute for Life Sciences, University of Southampton, Southampton, UK                                      |
| Bush A                          | National Heart and Lung Institute, Imperial College, London, UK;<br>Royal Brompton and Harefield NHS trust, UK                              |
| Caruso M                        | Dept. Clinical and Experimental Medicine, University of Catania, Catania, Italy;                                                            |
| Chaiboonchoe A                  | European Institute for Systems Biology and Medicine, CNRS-ENS-UCBL-INSERM, Lyon, France;                                                    |

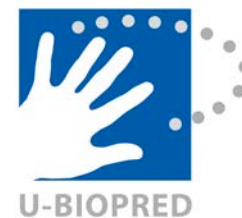

|               |                                                                                                                                                                                                                                                                                           |
|---------------|-------------------------------------------------------------------------------------------------------------------------------------------------------------------------------------------------------------------------------------------------------------------------------------------|
| Chanez P      | Assistance publique des Hôpitaux de Marseille - Clinique des bronches, allergies et sommeil, Aix Marseille Université, Marseille, France                                                                                                                                                  |
| Chung F K     | National Heart and Lung Institute, Imperial College, London, UK;                                                                                                                                                                                                                          |
| Compton C H   | Respiratory Therapeutic Unit, GSK, London, UK                                                                                                                                                                                                                                             |
| Corfield J    | Areteva R&D, Nottingham, UK;                                                                                                                                                                                                                                                              |
| D'Amico A     | University of Rome 'Tor Vergata', Rome Italy;                                                                                                                                                                                                                                             |
| Dahlén B      | Karolinska University Hospital & Centre for Allergy Research, Karolinska Institutet, Stockholm, Sweden                                                                                                                                                                                    |
| Dahlén S E    | Centre for Allergy Research, Karolinska Institutet, Stockholm, Sweden                                                                                                                                                                                                                     |
| De Meulder B  | European Institute for Systems Biology and Medicine, CNRS-ENS-UCBL-INSERM, Lyon, France;                                                                                                                                                                                                  |
| Djukanovic R  | NIHR Southampton Respiratory Biomedical Research Unit and Clinical and Experimental Sciences, Southampton, UK;                                                                                                                                                                            |
| Erpenbeck V J | Translational Medicine, Respiratory Profiling, Novartis Institutes for Biomedical Research, Basel, Switzerland;                                                                                                                                                                           |
| Erzen D       | Boehringer Ingelheim Pharma GmbH & Co. KG; Biberach, Germany                                                                                                                                                                                                                              |
| Fichtner K    | Boehringer Ingelheim Pharma GmbH & Co. KG; Biberach, Germany                                                                                                                                                                                                                              |
| Fitch N       | BioSci Consulting, Maasmechelen, Belgium;                                                                                                                                                                                                                                                 |
| Fleming L J   | National Heart and Lung Institute, Imperial College, London, UK; Royal Brompton and Harefield NHS trust, UK                                                                                                                                                                               |
| Formaggio E   | <i>Previously CROMSOURCE, Verona Italy</i>                                                                                                                                                                                                                                                |
| Fowler S J    | Division of infection, immunity and respiratory medicine, School of biological sciences, University of Manchester, Manchester University NHS Foundation Trust, Manchester Academic Health Science Centre, Manchester, United Kingdom                                                      |
| Frey U        | University Children's Hospital, Basel, Switzerland;                                                                                                                                                                                                                                       |
| Gahlemann M   | Boehringer Ingelheim (Schweiz) GmbH, Basel, Switzerland;                                                                                                                                                                                                                                  |
| Geiser T      | Department of Respiratory Medicine, University Hospital Bern, Switzerland;                                                                                                                                                                                                                |
| Goss V        | NIHR Respiratory Biomedical Research Unit, University Hospital Southampton NHS Foundation Trust, Integrative Physiology and Critical Illness Group, Clinical and Experimental Sciences, Sir Henry Wellcome Laboratories, Faculty of Medicine, University of Southampton, Southampton, UK; |
| Guo Y         | Data Science Institute, Imperial College, London, UK;                                                                                                                                                                                                                                     |
| Hashimoto S   | Academic Medical Centre, University of Amsterdam, Amsterdam, The Netherlands;                                                                                                                                                                                                             |
| Haughney J    | International Primary Care Respiratory Group, Aberdeen, Scotland;                                                                                                                                                                                                                         |
| Hedlin G      | Dept. Women's and Children's Health & Centre for Allergy Research, Karolinska Institutet, Stockholm, Sweden;                                                                                                                                                                              |
| Hekking P W   | Academic Medical Centre, University of Amsterdam, Amsterdam, The Netherlands;                                                                                                                                                                                                             |
| Higenbottam T | Allergy Therapeutics, West Sussex, UK;                                                                                                                                                                                                                                                    |
| Hohlfeld J M  | Fraunhofer Institute for Toxicology and Experimental Medicine, Hannover, Germany                                                                                                                                                                                                          |
| Holweg C      | Respiratory and Allergy Diseases, Genentech, San Francisco, USA                                                                                                                                                                                                                           |
| Horváth I     | Semmelweis University, Budapest, Hungary                                                                                                                                                                                                                                                  |
| Howarth P     | NIHR Southampton Respiratory Biomedical Research Unit, Clinical and Experimental Sciences and Human Development and Health, Southampton, UK                                                                                                                                               |
| James A J     | Centre for Allergy Research, Karolinska Institutet, Stockholm, Sweden;                                                                                                                                                                                                                    |
| Knowles RG    | Knowles Consulting Ltd, Stevenage. UK;                                                                                                                                                                                                                                                    |
| Knox A J      | Respiratory Research Unit, University of Nottingham, Nottingham, UK;                                                                                                                                                                                                                      |
| Krug N        | Fraunhofer Institute for Toxicology and Experimental Medicine, Hannover, Germany;                                                                                                                                                                                                         |

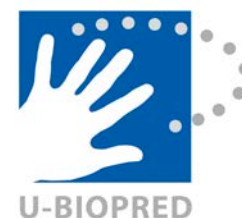

|                  |                                                                                                                                                                                                                                          |
|------------------|------------------------------------------------------------------------------------------------------------------------------------------------------------------------------------------------------------------------------------------|
| Lefaudeux D      | European Institute for Systems Biology and Medicine, CNRS-ENS-UCBL-INSERM, Lyon, France;                                                                                                                                                 |
| Loza M J         | Janssen R&D, USA;                                                                                                                                                                                                                        |
| Lutter R         | Academic Medical Centre, University of Amsterdam, Amsterdam, The Netherlands;                                                                                                                                                            |
| Manta A          | Roche Diagnostics GmbH, Mannheim, Germany                                                                                                                                                                                                |
| Masefield S      | European Lung Foundation, Sheffield, UK;                                                                                                                                                                                                 |
| Matthews J G     | Respiratory and Allergy Diseases, Genentech, San Francisco, USA;                                                                                                                                                                         |
| Mazein A         | European Institute for Systems Biology and Medicine, CNRS-ENS-UCBL-INSERM, Lyon, France                                                                                                                                                  |
| Meiser A         | Data Science Institute, Imperial College, London, UK                                                                                                                                                                                     |
| Middelveld R J M | Centre for Allergy Research, Karolinska Institutet, Stockholm, Sweden                                                                                                                                                                    |
| Miralpeix M      | Almirall, Barcelona, Spain;                                                                                                                                                                                                              |
| Montuschi P      | Università Cattolica del Sacro Cuore, Milan, Italy;                                                                                                                                                                                      |
| Mores N          | Università Cattolica del Sacro Cuore, Milan, Italy;                                                                                                                                                                                      |
| Murray C S       | Division of infection, immunity and respiratory medicine, School of biological sciences, University of Manchester, Manchester University NHS Foundation Trust, and Manchester Academic Health Science Centre, Manchester, United Kingdom |
| Musial J         | Dept. of Medicine, Jagiellonian University Medical College, Krakow, Poland                                                                                                                                                               |
| Myles D          | Respiratory Therapeutic Unit, GSK, London, UK;                                                                                                                                                                                           |
| Pahus L          | Assistance publique des Hôpitaux de Marseille, Clinique des bronches, allergies et sommeil<br>Espace Éthique Méditerranéen, Aix-Marseille Université, Marseille, France;                                                                 |
| Pandis I         | Data Science Institute, Imperial College, London, UK                                                                                                                                                                                     |
| Pavlidis S       | National Heart and Lung Institute, Imperial College, London, UK                                                                                                                                                                          |
| Postle A         | University of Southampton, UK                                                                                                                                                                                                            |
| Powel P          | European Lung Foundation, Sheffield, UK;                                                                                                                                                                                                 |
| Praticò G        | CROMSOURCE, Verona, Italy                                                                                                                                                                                                                |
| Puig Valls M     | CROMSOURCE, Barcelona, Spain                                                                                                                                                                                                             |
| Rao N            | Janssen R&D, USA;                                                                                                                                                                                                                        |
| Riley J          | Respiratory Therapeutic Unit, GSK, London, UK;                                                                                                                                                                                           |
| Roberts A        | Asthma UK, London, UK;                                                                                                                                                                                                                   |
| Roberts G        | NIHR Southampton Respiratory Biomedical Research Unit, Clinical and Experimental Sciences and Human Development and Health, Southampton, UK;                                                                                             |
| Rowe A           | Janssen R&D, UK;                                                                                                                                                                                                                         |
| Sandström T      | Dept of Public Health and Clinical Medicine, Umeå University, Umeå, Sweden;                                                                                                                                                              |
| Schofield JPR    | Centre for Proteomic Research, Institute for Life Sciences, University of Southampton, Southampton, UK                                                                                                                                   |
| Seibold W        | Boehringer Ingelheim Pharma GmbH, Biberach, Germany                                                                                                                                                                                      |
| Selby A          | NIHR Southampton Respiratory Biomedical Research Unit, Clinical and Experimental Sciences and Human Development and Health, Southampton, UK;                                                                                             |
| Shaw D E         | Respiratory Research Unit, University of Nottingham, UK;                                                                                                                                                                                 |
| Sigmund R        | Boehringer Ingelheim Pharma GmbH & Co. KG; Biberach, Germany                                                                                                                                                                             |
| Singer F         | University Children's Hospital, Zurich, Switzerland;                                                                                                                                                                                     |
| Skipp P J        | Centre for Proteomic Research, Institute for Life Sciences, University of Southampton, Southampton, UK                                                                                                                                   |
| Sousa A R        | Respiratory Therapeutic Unit, GSK, London, UK;                                                                                                                                                                                           |
| Sterk P J        | Academic Medical Centre, University of Amsterdam, Amsterdam, The Netherlands;                                                                                                                                                            |
| Sun K            | Data Science Institute, Imperial College, London, UK                                                                                                                                                                                     |
| Thornton B       | MSD, USA                                                                                                                                                                                                                                 |
| van Aalderen W M | Academic Medical Centre, University of Amsterdam, Amsterdam,                                                                                                                                                                             |



|              |                                                                                                                                                                                                                                 |
|--------------|---------------------------------------------------------------------------------------------------------------------------------------------------------------------------------------------------------------------------------|
|              | The Netherlands;                                                                                                                                                                                                                |
| van Geest M  | AstraZeneca, Mölndal, Sweden;                                                                                                                                                                                                   |
| Vestbo J     | Centre for Respiratory Medicine and Allergy, Institute of Inflammation and Repair, University of Manchester and University Hospital of South Manchester, Manchester Academic Health Sciences Centre, Manchester, United Kingdom |
| Vissing N H  | COPSAC, Copenhagen Prospective Studies on Asthma in Childhood, Herlev and Gentofte Hospital, University of Copenhagen, Copenhagen, Denmark;                                                                                     |
| Wagener A H  | Academic Medical Center Amsterdam, Amsterdam, The Netherlands                                                                                                                                                                   |
| Wagers S S   | BioSci Consulting, Maasmechelen, Belgium                                                                                                                                                                                        |
| Weiszhart Z  | Semmelweis University, Budapest, Hungary;                                                                                                                                                                                       |
| Wheelock C E | Centre for Allergy Research, Karolinska Institutet, Stockholm, Sweden;                                                                                                                                                          |
| Wilson S J   | Histochemistry Research Unit, Faculty of Medicine, University of Southampton, Southampton, UK;                                                                                                                                  |

### Contributors

|                                                                                                                              |
|------------------------------------------------------------------------------------------------------------------------------|
| Aliprantis Antonios, Merck Research Laboratories, Boston, USA;                                                               |
| Allen David, North West Severe Asthma Network, Pennine Acute Hospital NHS Trust, UK                                          |
| Alving Kjell, Dept Women's & Children's Health, Uppsala University, Uppsala, Sweden                                          |
| Badorrek P, Fraunhofer ITEM; Hannover, Germany                                                                               |
| Balgoma David, Centre for Allergy Research, Karolinska Institutet, Stockholm, Sweden                                         |
| Ballereau S, European institute for Systems Biology and Medicine, University of Lyon, France                                 |
| Barber Clair, NIHR Southampton Respiratory Biomedical Research Unit and Clinical and Experimental Sciences, Southampton, UK; |
| Batuwitage Manohara Kanangana, Data Science Institute, Imperial College, London, UK                                          |
| Bautmans An, MSD, Brussels, Belgium                                                                                          |
| Bedding A, Roche Diagnostics GmbH, Mannheim, Germany                                                                         |
| Behndig AF, Umeå University, Umea, Sweden                                                                                    |
| Beleta Jorge, Almirall S.A., Barcelona, Spain;                                                                               |
| Berglind A, MSD, Brussels, Belgium                                                                                           |
| Berton A, AstraZeneca, Mölndal, Sweden                                                                                       |
| Bochenek Grazyna, II Department of Internal Medicine, Jagiellonian University Medical College, Krakow, Poland;               |
| Braun Armin, Fraunhofer Institute for Toxicology and Experimental Medicine, Hannover, Germany;                               |
| Campagna D, Department of Clinical and Experimental Medicine, University of Catania, Catania, Italy;                         |
| <i>Carayannopoulos Leon, Previously at: MSD, USA;</i>                                                                        |
| Casaulta C, University Children's Hospital of Bern, Switzerland                                                              |
| Chaleckis Romanas, Centre of Allergy Research, Karolinska Institutet, Stockholm, Sweden                                      |
| Davison Timothy Janssen R&D, USA;                                                                                            |

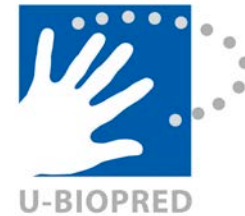

|                                                                                                                                                                                                                         |
|-------------------------------------------------------------------------------------------------------------------------------------------------------------------------------------------------------------------------|
| De Alba Jorge, Almirall S.A., Barcelona, Spain;                                                                                                                                                                         |
| De Lepeleire Inge, MSD, Brussels, BE                                                                                                                                                                                    |
| Dekker Tamara, Academic Medical Centre, University of Amsterdam, Amsterdam, The Netherlands;                                                                                                                            |
| Delin Ingrid, Centre for Allergy Research, Karolinska Institutet, Stockholm, Sweden                                                                                                                                     |
| Dennison P, NIHR Southampton Respiratory Biomedical Research Unit, Clinical and Experimental Sciences, NIHR-Wellcome Trust Clinical Research Facility, Faculty of Medicine, University of Southampton, Southampton, UK; |
| Dijkhuis Annemiek, Academic Medical Centre, University of Amsterdam, Amsterdam, The Netherlands;                                                                                                                        |
| Dodson Paul, AstraZeneca, Mölndal, Sweden                                                                                                                                                                               |
| Draper Aleksandra, BioSci Consulting, Maasmechelen, Belgium;                                                                                                                                                            |
| Dyson K, CROMSOURCE; Stirling, UK                                                                                                                                                                                       |
| Edwards Jessica, Asthma UK, London, UK;                                                                                                                                                                                 |
| El Hadjam L, European Institute for Systems Biology and Medicine, University of Lyon                                                                                                                                    |
| Emma Rosalia, Department of Clinical and Experimental Medicine, University of Catania, Catania, Italy;                                                                                                                  |
| Ericsson Magnus, Karolinska University Hospital, Stockholm, Sweden                                                                                                                                                      |
| Faulenbach C, Fraunhofer ITEM; Hannover, Germany                                                                                                                                                                        |
| Flood Breda, European Federation of Allergy and Airways Diseases Patient's Associations, Brussels, Belgium                                                                                                              |
| Galfy G, Semmelweis University, Budapest, Hungary;                                                                                                                                                                      |
| Gallart Hector, Centre for Allergy Research, Karolinska Institutet, Stockholm, Sweden                                                                                                                                   |
| Garissi D, Global Head Clinical Research Division, CROMSOURCE, Italy                                                                                                                                                    |
| Gent J, Royal Brompton and Harefield NHS Foundation Trust, London, UK;                                                                                                                                                  |
| Gerhardsson de Verdier M, AstraZeneca; Mölndal, Sweden;                                                                                                                                                                 |
| Gibeon D, National Heart and Lung Institute, Imperial College, London, UK;                                                                                                                                              |
| Gomez Cristina, Centre for Allergy Research, Karolinska Institutet, Stockholm, Sweden                                                                                                                                   |
| Gove Kerry, NIHR Southampton Respiratory Biomedical Research Unit and Clinical and Experimental Sciences, Southampton, UK;                                                                                              |
| Gozzard Neil, UCB, Slough, UK;                                                                                                                                                                                          |
| Guillmant-Farry E, Royal Brompton Hospital, London, UK                                                                                                                                                                  |
| Henriksson E, Karolinska University Hospital & Karolinska Institutet, Stockholm, Sweden                                                                                                                                 |
| Hewitt Lorraine, NIHR Southampton Respiratory Biomedical Research Unit, Southampton, UK                                                                                                                                 |
| Hoda U, Imperial College, London, UK                                                                                                                                                                                    |
| Hu Richard, Amgen Inc. Thousand Oaks, USA                                                                                                                                                                               |
| Hu Sile, National Heart and Lung Institute, Imperial College, London, UK;                                                                                                                                               |
| Hu X, Amgen Inc.; Thousand Oaks, USA                                                                                                                                                                                    |
| Jeyasingham E, UK Clinical Operations, GSK, Stockley Park, UK                                                                                                                                                           |
| Johnson K, Centre for respiratory medicine and allergy, Institute of Inflammation and repair, University Hospital of South Manchester, NHS Foundation Trust, Manchester, UK                                             |
| Jullian N, European Institute for Systems Biology and Medicine, University of Lyon                                                                                                                                      |



|                                                                                                                                                                            |
|----------------------------------------------------------------------------------------------------------------------------------------------------------------------------|
| Kamphuis Juliette, Longfonds, Amersfoort, The Netherlands;                                                                                                                 |
| Kennington Erika J., Asthma UK, London, UK;                                                                                                                                |
| Kerry Dyson, CromSource, Stirling, UK;                                                                                                                                     |
| Kerry G, Centre for respiratory medicine and allergy, Institute of Inflammation and repair, University Hospital of South Manchester, NHS Foundation Trust, Manchester, UK  |
| Klücklich M, Boehringer Ingelheim Pharma GmbH & Co. KG; Biberach, Germany                                                                                                  |
| Knobel Hugo, Philips Research Laboratories, Eindhoven, The Netherlands;                                                                                                    |
| Kolmert Johan, Centre for Allergy Research, Karolinska Institutet, Stockholm, Sweden                                                                                       |
| Konradsen J R, Dept. Women's and Children's Health & Centre for Allergy Research, Karolinska Institutet, Stockholm, Sweden                                                 |
| Kots Maxim, Chiesi Pharmaceuticals, SPA, Parma, Italy;                                                                                                                     |
| Kretsos Kosmas, UCB, Slough, UK                                                                                                                                            |
| Krueger L, University Children's Hospital Bern, Switzerland                                                                                                                |
| Kuo Scott, National Heart and Lung Institute, Imperial College, London, UK;                                                                                                |
| Kupczyk Maciej, Centre for Allergy Research, Karolinska Institutet, Stockholm, Sweden                                                                                      |
| Lambrecht Bart, University of Gent, Gent, Belgium;                                                                                                                         |
| Lantz A-S, Karolinska University Hospital & Centre for Allergy Research, Karolinska Institutet, Stockholm, Sweden                                                          |
| Larminie Christopher, GSK, London, UK                                                                                                                                      |
| Larsson L X, AstraZeneca, Mölndal, Sweden                                                                                                                                  |
| Latzin P, University Children's Hospital of Bern, Bern, Switzerland                                                                                                        |
| Lazarinis N, Karolinska University Hospital & Karolinska Institutet, Stockholm, Sweden                                                                                     |
| Lemonnier N, European Institute for Systems Biology and Medicine, CNRS-ENS-UCBL-INSERM, Lyon, France                                                                       |
| Lone-Latif Saeeda, Academic Medical Centre, University of Amsterdam, Amsterdam, The Netherlands;                                                                           |
| Lowe L A, Centre for respiratory medicine and allergy, Institute of Inflammation and repair, University Hospital of South Manchester, NHS Foundation Trust, Manchester, UK |
| Manta Alexander, Roche Diagnostics GmbH, Mannheim, Germany                                                                                                                 |
| Marouzet Lisa, NIHR Southampton Respiratory Biomedical Research Unit, Southampton, UK                                                                                      |
| Martin Jane, NIHR Southampton Respiratory Biomedical Research Unit, Southampton, UK                                                                                        |
| Mathon Caroline, Centre of Allergy Research, Karolinska Institutet, Stockholm, Sweden                                                                                      |
| McEvoy L, University Hospital, Department of Pulmonary Medicine, Bern, Switzerland                                                                                         |
| Meah Sally, National Heart and Lung Institute, Imperial College, London, UK;                                                                                               |
| Menzies-Gow A, Royal Brompton and Harefield NHS Foundation Trust, London, UK;                                                                                              |
| <i>Metcalf Leanne, Previously at: Asthma UK, London, UK;</i>                                                                                                               |
| Mikus Maria, Science for Life Laboratory & The Royal Institute of Technology, Stockholm, Sweden;                                                                           |
| Monk Philip, Synairgen Research Ltd, Southampton, UK;                                                                                                                      |
| Naz Shama, Centre for Allergy Research, Karolinska Institutet, Stockholm, Sweden                                                                                           |
| Nething K, Boehringer Ingelheim Pharma GmbH & Co. KG; Biberach, Germany                                                                                                    |





|                                                                                                                                        |
|----------------------------------------------------------------------------------------------------------------------------------------|
| Nicholas Ben, University of Southampton, Southampton, UK                                                                               |
| Nihlén U, <i>Previously AstraZeneca; Mölndal, Sweden;</i>                                                                              |
| Nilsson Peter, Science for Life Laboratory & The Royal Institute of Technology, Stockholm, Sweden;                                     |
| Niven R, North West Severe Asthma Network, University Hospital South Manchester, UK                                                    |
| Nordlund B, Dept. Women's and Children's Health & Centre for Allergy Research, Karolinska Institutet, Stockholm, Sweden                |
| Nsubuga S, Royal Brompton Hospital, London, UK                                                                                         |
| Östling Jörgen, AstraZeneca, Mölndal, Sweden;                                                                                          |
| Pacino Antonio, Lega Italiano Anti Fumo, Catania, Italy;                                                                               |
| Palkonen Susanna, European Federation of Allergy and Airways Diseases Patient's Associations, Brussels, Belgium.                       |
| Pellet J, European Institute for Systems Biology and Medicine, CNRS-ENS-UCBL-INSERM, Lyon, France                                      |
| Pennazza Giorgio, Unit of Electronics for Sensor Systems, Department of Engineering, Campus Bio-Medico University of Rome, Rome, Italy |
| Petrén Anne, Centre for Allergy Research, Karolinska Institutet, Stockholm, Sweden                                                     |
| Pink Sandy, NIHR Southampton Respiratory Biomedical Research Unit, Southampton, UK                                                     |
| Pison C, European Institute for Systems Biology and Medicine, CNRS-ENS-UCBL-INSERM, Lyon, France                                       |
| <i>Rahman-Amin Malayka, Previously at: Asthma UK, London, UK;</i>                                                                      |
| Ravanetti Lara, Academic Medical Centre, University of Amsterdam, Amsterdam, The Netherlands;                                          |
| Ray Emma, NIHR Southampton Respiratory Biomedical Research Unit, Southampton, UK                                                       |
| Reinke Stacey, Centre for Allergy Research, Karolinska Institutet, Stockholm, Sweden                                                   |
| <i>Reynolds Leanne, Previously at: Asthma UK, London, UK;</i>                                                                          |
| Riemann K, Boehringer Ingelheim Pharma GmbH & Co. KG; Biberach, Germany                                                                |
| Robberechts Martine, MSD, Brussels, Belgium                                                                                            |
| Rocha J P, Royal Brompton and Harefield NHS Foundation Trust                                                                           |
| Rossios C, National Heart and Lung Institute, Imperial College, London, UK;                                                            |
| Russell Kirsty, National Heart and Lung Institute, Imperial College, London, UK;                                                       |
| Rutgers Michael, Longfonds, Amersfoort, The Netherlands;                                                                               |
| Santini G, Università Cattolica del Sacro Cuore, Milan, Italy;                                                                         |
| Santonico Marco, Unit of Electronics for Sensor Systems, Department of Engineering, Campus Bio-Medico University of Rome, Rome, Italy  |
| Saqi M, European Institute for Systems Biology and Medicine, CNRS-ENS-UCBL-INSERM, Lyon, France                                        |
| Schoelch Corinna, Boehringer Ingelheim Pharma GmbH & Co. KG, Biberach, Germany                                                         |
| Scott S, North West Severe Asthma Network, Countess of Chester Hospital, UK                                                            |
| Sehgal N, North West Severe Asthma Network; Pennine Acute Hospital NHS Trust                                                           |
| Sjödin Marcus, Centre for Allergy Research, Karolinska Institutet, Stockholm, Sweden                                                   |
| Smids Barbara, Academic Medical Centre, University of Amsterdam, Amsterdam, The Netherlands;                                           |



|                                                                                                                                                                                                                      |
|----------------------------------------------------------------------------------------------------------------------------------------------------------------------------------------------------------------------|
| Smith Caroline, NIHR Southampton Respiratory Biomedical Research Unit, Southampton, UK                                                                                                                               |
| Smith Jessica, Asthma UK, London, UK;                                                                                                                                                                                |
| Smith Katherine M., University of Nottingham, UK;                                                                                                                                                                    |
| Söderman P, Dept. Women's and Children's Health, Karolinska Institutet, Stockholm, Sweden                                                                                                                            |
| Sogbesan A, Royal Brompton and Harefield NHS Foundation Trust, London, UK;                                                                                                                                           |
| Spycher F, University Hospital Department of Pulmonary Medicine, Bern, Switzerland                                                                                                                                   |
| Staykova Doroteya, University of Southampton, Southampton, UK                                                                                                                                                        |
| Stephan S, Centre for respiratory medicine and allergy, Institute of Inflammation and repair, University Hospital of South Manchester, NHS Foundation Trust, Manchester, UK                                          |
| Stokholm J, University of Copenhagen and Danish Pediatric Asthma Centre Denmark                                                                                                                                      |
| Strandberg K, Karolinska University Hospital & Karolinska Institutet, Stockholm, Sweden                                                                                                                              |
| Sunther M, Centre for respiratory medicine and allergy, Institute of Inflammation and repair, University Hospital of South Manchester, NHS Foundation Trust, Manchester, UK                                          |
| Szentkereszty M, Semmelweis University, Budapest, Hungary;                                                                                                                                                           |
| Tamasi L, Semmelweis University, Budapest, Hungary;                                                                                                                                                                  |
| Tariq K, NIHR Southampton Respiratory Biomedical Research Unit, Clinical and Experimental Sciences, NIHR-Wellcome Trust Clinical Research Facility, Faculty of Medicine, University of Southampton, Southampton, UK; |
| Thörngren John-Olof, Karolinska University Hospital, Stockholm, Sweden                                                                                                                                               |
| Thorsen Jonathan, COPSAC, Copenhagen Prospective Studies on Asthma in Childhood, Herlev and Gentofte Hospital, University of Copenhagen, Copenhagen, Denmark;                                                        |
| Valente S, Università Cattolica del Sacro Cuore, Milan, Italy;                                                                                                                                                       |
| van de Pol Marianne, Academic Medical Centre, University of Amsterdam, Amsterdam, The Netherlands;                                                                                                                   |
| van Drunen C M, Academic Medical Centre, University of Amsterdam, Amsterdam, The Netherlands;                                                                                                                        |
| Van Eyll Jonathan, UCB, Slough, UK                                                                                                                                                                                   |
| <i>Versnel Jenny, Previously at: Asthma UK, London, UK;</i>                                                                                                                                                          |
| Vink Anton, Philips Research Laboratories, Eindhoven, The Netherlands;                                                                                                                                               |
| von Garnier C, University Hospital Bern, Switzerland;                                                                                                                                                                |
| Vyas A, North west Severe Asthma Network, Lancashire Teaching Hospitals NHS Trust, UK                                                                                                                                |
| Wald Frans, Boehringer Ingelheim Pharma GmbH & Co. KG, Biberach, Germany                                                                                                                                             |
| Walker Samantha, Asthma UK, London, UK;                                                                                                                                                                              |
| Ward Jonathan, Histochemistry Research Unit, Faculty of Medicine, University of Southampton, Southampton, UK;                                                                                                        |
| Wetzel Kristiane, Boehringer Ingelheim Pharma GmbH, Biberach, Germany                                                                                                                                                |
| Wiegman Coen, National Heart and Lung Institute, Imperial College, London, UK;                                                                                                                                       |
| Williams Siân, International Primary Care Respiratory Group, Aberdeen, Scotland;                                                                                                                                     |
| Yang Xian, Data Science Institute, Imperial College, London, UK                                                                                                                                                      |
| Yeyasingham Elizabeth, UK Clinical Operations, GSK, Stockley Park, UK;                                                                                                                                               |
| Yu W, Amgen Inc.; Thousand Oaks, USA                                                                                                                                                                                 |





|                                                                                                                                                          |
|----------------------------------------------------------------------------------------------------------------------------------------------------------|
| Zetterquist W, Dept. Women's and Children's Health & Centre for Allergy Research, Karolinska Institutet, Stockholm, Sweden                               |
| Zolkipli Z, NIHR Southampton Respiratory Biomedical Research Unit, Clinical and Experimental Sciences and Human Development and Health, Southampton, UK; |
| Zwinderman A H, Academic Medical Centre, University of Amsterdam, The Netherlands;                                                                       |

| <b>Partner organisations</b>                                                             |                                                 |
|------------------------------------------------------------------------------------------|-------------------------------------------------|
| Novartis Pharma AG                                                                       | University of Southampton, Southampton, UK      |
| Academic Medical Centre, University of Amsterdam, Amsterdam, The Netherlands             | Imperial College London, London, UK             |
| University of Catania, Catania, Italy                                                    | University of Rome 'Tor Vergata', Rome, Italy   |
| Hvidore Hospital, Hvidore, Denmark                                                       | Jagiellonian Univ. Medi.College, Krakow, Poland |
| University Hospital, Inselspital, Bern, Switzerland                                      | Semmelweis University, Budapest, Hungary        |
| University of Manchester, Manchester, UK                                                 | Université d'Aix-Marseille, Marseille, France   |
| Fraunhofer Institute, Hannover, Germany                                                  | University Hospital, Umea, Sweden               |
| Ghent University, Ghent, Belgium                                                         | Ctr. Nat. Recherche Scientifique, Lyon, France  |
| Università Cattolica del Sacro Cuore, Rome, Italy                                        | University Hospital, Copenhagen, Denmark        |
| Karolinska Institutet, Stockholm, Sweden                                                 | Nottingham University Hospital, Nottingham, UK  |
| University of Bergen, Bergen, Norway                                                     | Netherlands Asthma Foundation, Leusden, NL      |
| European Lung Foundation, Sheffield, UK                                                  | Asthma UK, London, UK                           |
| European. Fed. of Allergy and Airways Diseases Patients' Associations, Brussels, Belgium | Lega Italiano Anti Fumo, Catania, Italy         |
| International Primary Care Respiratory Group, Aberdeen, Scotland                         | Philips Research Laboratories, Eindhoven, NL    |
| Synairgen Research Ltd, Southampton, UK                                                  | Aerocrine AB, Stockholm, Sweden                 |
| BioSci Consulting, Maasmechelen, Belgium                                                 | Almirall                                        |
| AstraZeneca                                                                              | Boehringer Ingelheim                            |
| Chiesi                                                                                   | GlaxoSmithKline                                 |
| Roche                                                                                    | UCB                                             |



|                         |          |
|-------------------------|----------|
| Janssen Biologics BV    | Amgen NV |
| Merck Sharp & Dome Corp |          |

| <b>MEMBERS OF THE ETHICS BOARD</b> |                                         |                      |                                                |
|------------------------------------|-----------------------------------------|----------------------|------------------------------------------------|
| <b>Name</b>                        | <b>Task</b>                             | <b>Affiliation</b>   | <b>e-mail</b>                                  |
| Jan-Bas Prins                      | Biomedical research                     | LUMC/the Netherlands | J.B.Prins@lumc.nl                              |
| Martina Gahlemann                  | Clinical care                           | BI/Germany           | Martina.Gahlemann@boehringer-<br>ingelheim.com |
| Luigi Visintin                     | Legal affairs                           | LIAF/Italy           | visintin@inrete.it                             |
| Hazel Evans                        | Paediatric care                         | Southampton/UK       | hazel.evans@uhs.nhs.uk                         |
| Martine Puhl                       | Patient representation (co chair)       | NAF/ the Netherlands | martine@puhl.nl                                |
| Lina Buzermaniene                  | Patient representation                  | EFA/Lithuania        | lina.buzermaniene@pavb.lt                      |
| Val Hudson                         | Patient representation                  | Asthma UK            | hudsonval7@gmail.com                           |
| Laura Bond                         | Patient representation                  | Asthma UK            | lvbond22@googlemail.com                        |
| Pim de Boer                        | Patient representation and pathobiology | IND                  | deboer.pim@hetnet.nl                           |
| Guy Widdershoven                   | Research ethics                         | VUMC/the Netherlands | g.widdershoven@vumc.nl                         |
| Ralf Sigmund                       | Research methodology and biostatistics  | BI/Germany           | ralf.sigmund@boehringer-<br>ingelheim.com      |

| <b>THE PATIENT INPUT PLATFORM</b> |                 |
|-----------------------------------|-----------------|
| <b>Name</b>                       | <b>Country</b>  |
| Amanda Roberts                    | UK              |
| David Supple (chair)              | UK              |
| Dominique Hamerlijnck             | The Netherlands |

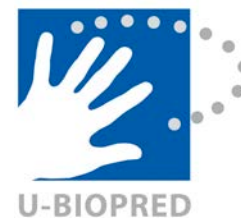

|                        |                 |
|------------------------|-----------------|
| Jenny Negus            | UK              |
| Juliëtte Kamphuis      | The Netherlands |
| Lehanne Sergison       | UK              |
| Luigi Visintin         | Italy           |
| Pim de Boer (co-chair) | The Netherlands |
| Susanne Onstein        | The Netherlands |

| <b>MEMBERS OF THE SAFETY MONITORING BOARD</b> |                                                    |
|-----------------------------------------------|----------------------------------------------------|
| <b>Name</b>                                   | <b>Task</b>                                        |
| William MacNee                                | Clinical care                                      |
| Renato Bernardini                             | Clinical pharmacology                              |
| Louis Bont                                    | Paediatric care and infectious diseases            |
| Per-Ake Wecksell                              | Patient representation                             |
| Pim de Boer                                   | Patient representation and pathobiology (chair)    |
| Martina Gahlemann                             | Patient safety advice and clinical care (co-chair) |
| Ralf Sigmund                                  | Bio-informatician                                  |
